# Supplementary material for: Prevalence of physical health conditions and health risk behaviours in people with severe mental illness in South Asia: protocol for a cross-sectional study (IMPACT SMI survey)
Source: PubMed Central journal article supplement (PMC7549451; doi:10.1136/bmjopen-2020-037869), 2020-10-10
Supplement: bmjopen-2020-037869.draft_revisions.pdf [file bmjopen-2020-037869.draft_revisions.pdf]

# BMJ Open

BMJ Open is committed to open peer review. As part of this commitment we make the peer review history of every article we publish publicly available.

When an article is published we post the peer reviewers' comments and the authors' responses online. We also post the versions of the paper that were used during peer review. These are the versions that the peer review comments apply to.

The versions of the paper that follow are the versions that were submitted during the peer review process. They are not the versions of record or the final published versions. They should not be cited or distributed as the published version of this manuscript.

BMJ Open is an open access journal and the full, final, typeset and author-corrected version of record of the manuscript is available on our site with no access controls, subscription charges or pay-per-view fees (<http://bmjopen.bmj.com>).

If you have any questions on BMJ Open's open peer review process please email [info.bmjopen@bmj.com](mailto:info.bmjopen@bmj.com)

# BMJ Open

## INVESTIGATING MENTAL AND PHYSICAL COMORBIDITY: Protocol for a survey in people with severe mental illness in South Asia (IMPACT SMI survey)

|                               |                                                                                                                                                                                                                                                                                                                                                                                                                                                                                                                                                                                                                                                                                                                                                                                                                                                                                             |
|-------------------------------|---------------------------------------------------------------------------------------------------------------------------------------------------------------------------------------------------------------------------------------------------------------------------------------------------------------------------------------------------------------------------------------------------------------------------------------------------------------------------------------------------------------------------------------------------------------------------------------------------------------------------------------------------------------------------------------------------------------------------------------------------------------------------------------------------------------------------------------------------------------------------------------------|
| Journal:                      | <i>BMJ Open</i>                                                                                                                                                                                                                                                                                                                                                                                                                                                                                                                                                                                                                                                                                                                                                                                                                                                                             |
| Manuscript ID                 | bmjopen-2020-037869                                                                                                                                                                                                                                                                                                                                                                                                                                                                                                                                                                                                                                                                                                                                                                                                                                                                         |
| Article Type:                 | Protocol                                                                                                                                                                                                                                                                                                                                                                                                                                                                                                                                                                                                                                                                                                                                                                                                                                                                                    |
| Date Submitted by the Author: | 19-Feb-2020                                                                                                                                                                                                                                                                                                                                                                                                                                                                                                                                                                                                                                                                                                                                                                                                                                                                                 |
| Complete List of Authors:     | Zavala, Gerardo A.; University of York,<br>Prasad, Krishna; National Institute of Mental Health and Neuro Sciences<br>Aslam, Faiza; Institute of Psychiatry<br>Barua, Deepa; ARK Foundation<br>Haidar, Asiful; ARK Foundation<br>Hewitt, Catherine; The University of York, Health Sciences<br>Huque, Rumana; ARK Foundation<br>Mansoor, Sonia; Institute of Psychiatry<br>Murthy, Pratima; National Institute of Mental Health and NeuroSciences,<br>Centre for Addiction Medicine<br>Nizami, Asad; Institute of Psychiatry<br>Siddiqi, Najma; University of York, Psychiatry, Hull York Medical School,<br>York and Bradford District Care NHS Foundation Trust, Bradford, UK<br>Sikander, Siham; Health Services Academy<br>Siddiqi, Kamran; University of York, UK, Institute of Health Sciences<br>Boehnke, Jan Rasmus; University of Dundee, School of Nursing and<br>Health Sciences |
| Keywords:                     | MENTAL HEALTH, Schizophrenia & psychotic disorders < PSYCHIATRY,<br>PSYCHIATRY                                                                                                                                                                                                                                                                                                                                                                                                                                                                                                                                                                                                                                                                                                                                                                                                              |
|                               |                                                                                                                                                                                                                                                                                                                                                                                                                                                                                                                                                                                                                                                                                                                                                                                                                                                                                             |

SCHOLARONE™  
Manuscripts

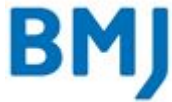

I, the Submitting Author has the right to grant and does grant on behalf of all authors of the Work (as defined in the below author licence), an exclusive licence and/or a non-exclusive licence for contributions from authors who are: i) UK Crown employees; ii) where BMJ has agreed a CC-BY licence shall apply, and/or iii) in accordance with the terms applicable for US Federal Government officers or employees acting as part of their official duties; on a worldwide, perpetual, irrevocable, royalty-free basis to BMJ Publishing Group Ltd ("BMJ") its licensees and where the relevant Journal is co-owned by BMJ to the co-owners of the Journal, to publish the Work in this journal and any other BMJ products and to exploit all rights, as set out in our [licence](#).

The Submitting Author accepts and understands that any supply made under these terms is made by BMJ to the Submitting Author unless you are acting as an employee on behalf of your employer or a postgraduate student of an affiliated institution which is paying any applicable article publishing charge ("APC") for Open Access articles. Where the Submitting Author wishes to make the Work available on an Open Access basis (and intends to pay the relevant APC), the terms of reuse of such Open Access shall be governed by a Creative Commons licence – details of these licences and which [Creative Commons](#) licence will apply to this Work are set out in our licence referred to above.

Other than as permitted in any relevant BMJ Author's Self Archiving Policies, I confirm this Work has not been accepted for publication elsewhere, is not being considered for publication elsewhere and does not duplicate material already published. I confirm all authors consent to publication of this Work and authorise the granting of this licence.

1  
2  
3 1 **INVESTIGATING MENTAL AND PHYSICAL COMORBIDITY: Protocol for a survey in people with severe**  
4 2 **mental illness in South Asia (IMPACT SMI survey)**

5  
6 3 G.A. Zavala<sup>1</sup>, K. Prasad<sup>2</sup>, F. Aslam<sup>3</sup>, D. Barua<sup>4</sup>, A. Haidar<sup>4</sup>, C. Hewitt<sup>1</sup>, R. Huque<sup>4</sup>, S. Mansoor<sup>3</sup>, P. Murthy<sup>2</sup>,  
7 4 A. T. Nizami<sup>3</sup>, N. Siddiqi<sup>1,5,6</sup>, S. Sikander<sup>7,8</sup>, K. Siddiqi<sup>1,5</sup>, J.R. Boehnke<sup>1,9</sup> and on behalf of the IMPACT  
8 5 team.

9 6 **Affiliations**

10 7 <sup>1</sup>Department of Health Sciences, York University, Heslington, YO10 5DD, York, UK

11 8 <sup>2</sup> National Institute of Mental Health and Neurosciences (NIMHANS), Bangalore, India.

12 9 <sup>3</sup> Institute of Psychiatry (IoP), Rawalpindi, Pakistan

13 10 <sup>4</sup>ARK Foundation, Dhaka, Bangladesh

14 11 <sup>5</sup> Hull York Medical School, University of York Communications Office, Heslington, York, UK

15 12 <sup>6</sup> Bradford District Care NHS Foundation Trust, Bradford, UK

16 13 <sup>7</sup> Human Development Research Foundation, Islamabad, Pakistan

17 14 <sup>8</sup>Public Health, Health Services Academy, Islamabad, Pakistan

18 15 <sup>9</sup>School of Nursing and Health Sciences, University of Dundee, Dundee, UK

19 16 G.A. Zavala <https://orcid.org/0000-0002-9825-8725> Corresponding author: [gzavala@gmail.com](mailto:gzavala@gmail.com)

20 17 K. Prasad

21 18 F. Aslam <https://orcid.org/0000-0002-7847-7250>

22 19 D. Barua <https://orcid.org/0000-0002-0122-9048>

23 20 A. Haidar <https://orcid.org/0000-0001-9015-4414>

24 21 C. Hewitt <https://orcid.org/0000-0002-0415-3536>

25 22 R. Huque <http://orcid.org/0000-0003-4724-0581>

26 23 S. Mansoor <http://orcid.org/0000-0002-9837-6852>

27 24 P. Murthy <https://orcid.org/0000-0002-7738-9670>

28 25 A. T. Nizami <https://orcid.org/0000-0002-7853-8519>

29 26 N. Siddiqi <https://orcid.org/0000-0003-1794-2152>

30 27 S. Sikander <https://orcid.org/0000-0002-0223-7234>

31 28 K. Siddiqi <https://orcid.org/0000-0003-1529-7778>

32 29 J.R. Boehnke <https://orcid.org/0000-0003-0249-1870>

1  
2  
3 31 **Abstract**  
4

5 32 **Introduction:** People with severe mental illness (SMI) die on average 10-20 years earlier than the  
6 33 general population. Most of these deaths are due to physical health conditions. The aim of this cross-  
7 34 sectional study is to determine the prevalence and determinants of physical disorders in people with  
8 35 SMI attending specialist mental health facilities in South Asia.

9 36 **Methods:** We will conduct a survey of patients with SMI attending specialist mental health facilities in  
10 37 Bangladesh, India and Pakistan (n=4,500). Diagnosis of SMI will be confirmed using the MINI V-6.0. We  
11 38 will collect information about: physical health and related health-risk behaviours (WHO STEPs); severity  
12 39 of common mental disorders (PHQ-9 and GAD-7); and health-related quality of life (EQ-5D-5L). We will  
13 40 measure blood pressure, height, weight and waist-circumference according to WHO guidelines. We will  
14 41 also measure glycated haemoglobin (HbA1c), lipid profile, thyroid function, liver function, creatinine  
15 42 and haemoglobin.

16 43 **Analysis:** Prevalence rates of physical health conditions and health-risk behaviours will be presented  
17 44 and compared with the WHO STEPs survey findings in the general population. Regression analyses will  
18 45 explore the association between health-risk behaviours, mental and physical health conditions. The  
19 46 IMPACT SMI survey will provide the prevalence of different physical health conditions and health-risk  
20 47 behaviours in the SMI population, and the influence of each of these conditions in terms of health  
21 48 related quality of life

22 49 **Ethics and dissemination:** The study has been approved by the ethics committees of the Department  
23 50 of Health Sciences University of York (UK), Centre for Injury Prevention and Rehabilitation (Bangladesh),  
24 51 Health Ministry Screening Committee and Indian Council of Medical Research (India) and National  
25 52 Bioethics Committee (Pakistan). Findings will be disseminated in peer reviewed articles, in local and  
26 53 international conferences and as reports for policy makers and stakeholders in the countries involved.

27 54 **Trial registration:** ISRCTN88485933; <https://doi.org/10.1186/ISRCTN88485933>, 3th of June 2019

28 55 **Key words:** Multimorbidity, Comorbidity, Lifestyle, Severe mental illness, South Asia, health risk  
29 56 behaviours, schizophrenia, bipolar disorders, psychosis  
30 57

1  
2  
3 58 **Article summary**  
4

5 59 ***Strengths and limitations***  
6

- 7 60 • The IMPACT SMI survey will provide the prevalence of different physical health conditions and  
8 61 health-risk behaviours in the SMI population in the South Asian region for the first time.
- 9 62 • The study is using standardized tools to measure patient outcomes that will allow us to  
10 63 compare the findings with those of the general population.
- 11  
12 64 • The survey is being conducted in specialist centres (with patients with capacity) and is  
13 65 therefore a health care utilisation sample drawn largely from tertiary care.
- 14  
15  
16  
17  
18  
19  
20  
21  
22  
23  
24  
25  
26  
27  
28  
29  
30  
31  
32  
33  
34  
35  
36  
37  
38  
39  
40  
41  
42  
43  
44  
45  
46  
47  
48  
49  
50  
51  
52  
53  
54  
55  
56  
57  
58  
59  
60

For peer review only

## 67 Background

68 A considerable body of research has shown that people with severe mental illness (SMI; i.e. psychotic  
69 disorders, bipolar affective disorder and severe depression with psychosis) die on average 10-20 years  
70 earlier than the general population<sup>1 2</sup>. This excess mortality is a major global public health challenge  
71 but efforts to address it have been limited. Recent studies suggest that despite an overall improvement  
72 in life expectancy for both the general population and people with severe mental illness, the absolute  
73 mortality gap between these two groups is actually widening<sup>3-5</sup>.

74 Around 80% of deaths in people with SMI are due to preventable physical illnesses, most commonly  
75 cardio-metabolic diseases, respiratory disorders, and infectious diseases<sup>6 7</sup>. Prevalence of most physical  
76 health conditions is higher and outcomes are poorer in this population.<sup>8</sup> Multimorbidity (the presence  
77 of two or more conditions) is also more common<sup>9</sup> in the presence of SMI, contributing to poorer  
78 physical health and quality of life. The majority of evidence for these health inequalities has been  
79 generated in high-income countries (HICs), but a small number of studies from low- and middle-income  
80 countries (LMICs) also show a similar pattern of increased mortality for people with SMI, with an even  
81 shorter life expectancy, and larger mortality gap<sup>7 10-12</sup>. The few studies available suggest that physical  
82 comorbidity in SMI is at least as prevalent as in developed countries<sup>1</sup>.

83 In South Asia, rates of mental illness and non-communicable diseases have been increasing rapidly<sup>13</sup>  
84<sup>14</sup>. This increase, coupled with the lack of access to even basic mental healthcare<sup>15</sup>, and neglect of the  
85 physical health needs of people with SMI by policymakers and healthcare services<sup>16</sup>, means that the  
86 burden of disease due to physical disorders in people with mental illness is set to rise further, with a  
87 corresponding increase in within country and global health inequalities. Addressing mental and physical  
88 health comorbidity in LMICs is a global priority, recognized in global policies to help achieve the  
89 Sustainable Development Goals, including “ensuring healthy lives and promoting well-being for all”<sup>17-</sup>  
90<sup>19</sup>. A detailed understanding of the determinants of physical ill health in SMI in LMICs is needed to  
91 progress this agenda<sup>20</sup>.

## 92 Objectives

93 In people with SMI attending specialist mental health facilities:

- 94 1. Determine the prevalence of physical disorders and health-risk behaviours and compare these  
95 findings with those established in the general population.
- 96 2. Determine the association between physical disorders, health-risk behaviours, health-related  
97 quality of life and various demographic, behavioural, cognitive, psychological and social  
98 variables.
- 99 3. Identify lifestyle advice that has been offered for this SMI population.
- 100 4. Support clinical trial readiness by providing evidence-based findings regarding outcome  
101 measures and procedures relevant for clinical trials design.

## 102 Methods and analysis

### 103 Design, settings & population

104 We will conduct a cross-sectional survey among patients with a clinical diagnosis of SMI recruited at  
105 specialist mental health institutions in Bangladesh (National Institute of Mental Health (NIMH)), India  
106 (National Institute of Mental Health and Neurosciences (NIMHANS)) and Pakistan (Institute of  
107 Psychiatry (IoP)). All three are national institutes offering specialist mental health services. Adults (18  
108 years and over) with a clinical diagnosis of SMI (i.e. schizophrenia, schizoaffective disorder, bipolar  
109 affective disorder, severe depression with psychosis) that are able to provide informed consent as  
110 assessed by the treating clinician will be recruited. Patients who lack capacity to provide consent or are  
111 unable to complete study questionnaires will be excluded (figure 1). The data will be collected from  
112 June 2019 until September 2020.

113

114

115 **Figure 1.** Flow diagram of the study

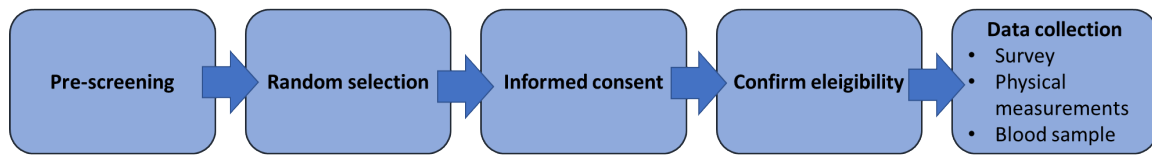

116  
117 **Sample size**

118 We aim to build as large a sample as possible within the resources available over the study period  
119 (n=4500). As an indicative example of survey precision to address some of the key research questions,  
120 we provide a sample size estimate for investigating the prevalence of diabetes. Assuming a prevalence  
121 estimate of 10% (based on results from previous studies<sup>21</sup>), we will need 857 participants per country  
122 to achieve  $\pm 2\%$  precision assuming a 95% confidence interval<sup>22</sup>.

123 **Recruitment and random selection of the participants**

124 Both in- and outpatients attending the specialist mental health institutions of the study will be  
125 recruited. When resources or the volume of patients do not allow recruitment of all patients presenting  
126 at the institution, we will use random selection of attending patients.

127 **Informed consent**

128 In the first instance, the researchers will give an information sheet to the patient, providing written and  
129 verbal information on the potential benefits and risks of taking part in the study and clarifying the  
130 assessments involved in the study. Only people who provided written informed consent will be included  
131 in the study. Where there are problems with literacy, the researchers will provide this information  
132 verbally to both the carer and the patient. Those unable to provide a signature will be requested to  
133 indicate their consent with a thumbprint. The information sheet will meet all the requirements of the  
134 relevant ethics committees. Maintenance of confidentiality and compliance with international, UK and  
135 relevant local Data Protection Acts will be emphasised to all study participants. Moreover, all  
136 participants will be informed that their participation in the study is voluntary, consent can be  
137 withdrawn at any stage and the decision about participation will not affect their care.

138 Mental capacity is time- and decision-specific. For patients who are assessed to lack capacity by their  
139 local physician, seeking informed consent will be delayed until capacity is regained, if feasible. No  
140 assessments will be continued where the patient appears reluctant, even where patient consent has  
141 been obtained.

142 Optional 'consent to contact' about future studies will be sought from survey participants. Permission  
143 will be sought to retain participant details and to contact participants about future studies that may be  
144 relevant for them. Again, it will be emphasised that this is voluntary, they can withdraw permission at  
145 any time and this will not affect their care in any way. After consenting to participate, the participant  
146 will be given a unique patient identifier (ID) by the researcher. The patient consent and contact  
147 information will be entered into a database (participant log), which will be kept separate from the  
148 survey results database. The survey results database will include only the unique patient ID, and no  
149 patient identifiable data.

150 **Confirmation of eligibility**

151 SMI diagnosis will be confirmed by trained researchers using the relevant modules from the Mini-  
152 international neuropsychiatric interview (MINI) version 6.0<sup>23</sup>. The MINI is a short diagnostic structured  
153 interview to explore mental disorders. It is designed to allow administration by non-specialist  
154 interviewers<sup>24</sup>. The inter-rater reliability for the MINI will be assessed at each site at the start of study.  
155 Within each study site, at least 10 MINI questionnaires will be completed and compared between two  
156 different researchers blinded from each other. Where needed, further training will be offered to  
157 achieve acceptable inter-rater reliability before researchers are assigned to the study.



1  
2  
3  
4  
5  
6  
7  
8  
9  
10  
11  
12  
13  
14  
15  
16  
17  
18  
19  
20  
21  
22  
23  
24  
25  
26  
27  
28  
29  
30  
31  
32  
33  
34  
35  
36  
37  
38  
39  
40  
41  
42  
43  
44  
45  
46  
47  
48  
49  
50  
51  
52  
53  
54  
55  
56  
57  
58  
59  
60**158 Data collection**

159 We will conduct a face-to-face digital survey to collect information about physical health and health-  
160 risk behaviours, severity of common mental disorders and health-related quality of life using validated  
161 instruments as described below.

162 The WHO STEPwise approach to Surveillance (STEPS) instrument Version 3.2 will be used to collect  
163 information about non-communicable diseases and related health-risk behaviours<sup>25</sup>. STEPs is an  
164 international standardized tool that will allow comparisons with the general population within the  
165 country and between countries<sup>26</sup>. The instrument has already been translated, used and validated in  
166 the general population in Bangladesh, India and Pakistan <sup>27-29</sup>.

167 To allow patients to disclose information on sexually transmitted diseases, HIV diagnosis, alcohol and  
168 tobacco consumption, in agreement with patient's wishes, the interviewer will ask the caregivers/  
169 attendants to leave the room for this part of the interview

**170 Demographic information**

171 The STEPs demographic module will be used to collect information on age, sex, education, marital  
172 status, employment and income <sup>25</sup>.

**173 Health-risk behaviours**

174 The STEPs tobacco modules will be used to assess tobacco-related behaviours <sup>25</sup>.

**175 Alcohol consumption**

176 The STEPs alcohol module will be used to determine lifetime abstainers, past 12 months abstainers and  
177 current users of alcohol using the WHO cut-off scores <sup>25</sup>.

**178 Diet**

179 The STEPs diet module will be used to record the number of days that respondents consumed fruit and  
180 vegetables in a typical week, and the number of servings of fruit and vegetables consumed on average  
181 per day <sup>30</sup>.

**182 Physical activity**

183 The STEPs physical activity module will be used to record activity for transport purposes (e.g. walking,  
184 cycling), vigorous and moderate activity at work, and vigorous, moderate activity in leisure time, and  
185 time spent sitting. Show-cards with culturally relevant examples will be used to aid respondents in  
186 classifying activities. Analysis and categorization will follow the WHO guidelines<sup>31</sup>.

**187 Non-communicable diseases**

188 Any medically-diagnosed history of raised blood pressure, heart disease, hypercholesterolemia, and  
189 high blood glucose, and treatment advised by a health worker for these diseases (such as prescribed  
190 medicines, a special diet, advice to reduce salt intake, lose weight, stop smoking, or do more exercise)  
191 will be collected using the STEPs module for non-communicable diseases. Lung disease is not included  
192 in the STEPs survey. However, it will be recorded asking the same set of questions as the non-  
193 communicable diseases included in the STEPs survey.

**194 Infectious diseases**

195 Self-report of medically-diagnosed history of hepatitis B, C, syphilis, tuberculosis, HIV and intestinal  
196 parasites will be recorded.

**197 Risk behaviours related to sexually transmitted diseases**

198 Risk behaviours related to sexually transmitted diseases will be assessed using three questions that  
199 examine the presence of multiple sexual partners, unprotected sexual contact and use of injectable  
200 drugs that have been adapted from the 10 item HIV risk Screening Instrument <sup>32</sup>. This instrument has  
201 been previously used in research involving persons with severe mental illness in India <sup>33</sup>.

202 *Depressive and anxiety symptoms*

203 The 9-item depression module (PHQ-9)<sup>34</sup> will be used to measure the severity of depressive symptoms  
204 and the generalized anxiety disorder 7 item scale (GAD-7)<sup>35</sup> for the severity of anxiety symptoms.

205 *Health-Related Quality of life*

206 The EQ-5D-5L will be used to measure health-related quality of life<sup>36,37</sup>. The EQ-5D-5L is a standardised  
207 measure of health status, it provides a simple, generic measure of health for clinical and economic  
208 appraisal. The impact of disease/disorder is characterised on five dimensions (mobility, self-care, ability  
209 to undertake usual activities, pain, anxiety / depression). The EQ-5D-5L further assesses a patient's  
210 subjective evaluation of their health state based on a visual analogue scale (EQ-5d-VAS) between "0 -  
211 worst imaginable health state" and "100 - best imaginable health state".

212 *Blood pressure and heart rate*

213 Blood pressure (BP) and pulse rate will be taken three times using an automated blood pressure  
214 measuring instrument (OMRON®). For BP measurement the participant must be comfortable and  
215 rested. If he/she had been exerting themselves, then there will be a minimum of a 15 minute rest period  
216 before the recording is taken. There should be at least a three minute gap between the BP recordings.  
217 The procedure will follow the step wise instructions in the WHO STEPS surveillance manual<sup>38</sup>.

218 *Height weight and waist circumference*

219 Height will be measured to a precision of 0.1 cm using a portable height measuring board without  
220 footwear and headgear. Weight will be measured in kilograms using a portable weighing scale placed  
221 on a firm flat surface with light clothing and without footwear and socks. Waist circumference will be  
222 measured in to a precision of 0.1 cm, using a flexible fibre glass anthropometric tape at the end of  
223 normal expiration, at the midpoint between the lower margin of the last palpable rib and the top of the  
224 iliac crest (hip bone), with the arms relaxed at the sides. All measurements will be taken in duplicate  
225 and the average of the two values will be recorded and the protocols of the WHO STEPS surveillance  
226 manual will be followed<sup>38</sup>.

227 *Biochemical analysis*

228 A blood sample (8 to 9 ml) will be taken from consenting participants for: glycated haemoglobin  
229 (HbA1c), lipid profile (triglycerides, total cholesterol, HDL cholesterol, LDL cholesterol), thyroid function  
230 tests (includes T3, T4, TSH), liver function tests (total Bilirubin, AST, ALT, ALP, total protein, albumin,  
231 albumin to globulin ratio), creatinine and haemoglobin.

232 *Data management*

233 To ensure quality of collected data, validation, checking, proofing and cleaning procedures will be  
234 carried out according to standard procedures<sup>39</sup>. All consent forms will be stored separately from survey  
235 data in locked cabinets in locked offices at study research offices at each study site. All coded data will  
236 be transferred to, and stored as anonymous data at the University of York which will act as the data  
237 curator. A secure password protected and encrypted electronic database will be set up to store the  
238 data.

239 *Statistical analysis*

240 Quantitative data will be summarised using descriptive statistics. First, prevalence rates of infectious  
241 diseases, long-term physical health conditions (e.g. diabetes, heart disease) and health-risk behaviours  
242 for type II diabetes, cardiovascular and respiratory disorders (e.g. tobacco use, obesity, physical activity,  
243 diet) will be estimated in the severe mental illness population. Second, these rates will be compared  
244 with results from the WHO STEPs survey in the general population. Finally, we will examine the  
245 associations between physical health conditions and health-risk behaviours, using regression models  
246 with random intercepts for data collection site with the following potential covariates: demographic  
247 variables (i.e. age, sex, and level of education), history of mental and physical conditions and  
248 biomarkers (e.g. BMI, blood pressure). These regression models will also be used to calculate  
249 prevalence rates of physical health conditions and health-risk behaviors adjusted for these covariates.

1  
2  
3  
4  
5  
6  
7  
8  
9  
10  
11  
12  
13  
14  
15  
16  
17  
18  
19  
20  
21  
22  
23  
24  
25  
26  
27  
28  
29  
30  
31  
32  
33  
34  
35  
36  
37  
38  
39  
40  
41  
42  
43  
44  
45  
46  
47  
48  
49  
50  
51  
52  
53  
54  
55  
56  
57  
58  
59  
60

250 Further regression analyses will explore the association between mental and physical health conditions  
251 and health-related quality of life measured using EQ-5D-5L.

252 Regression models will take account of the nature and distribution of data (e.g. count versus continuous  
253 data; skewed versus normally distributed data). Additional analyses using network models<sup>40</sup> and  
254 psychometric approaches will investigate comorbidity patterns (within and across physical and mental  
255 symptoms) as well as the structure of severe mental illness symptoms<sup>41-43</sup>.

256

## 257 **Ethics and dissemination**

258 The study has been approved by the ethics committees of the Department of Health Sciences University  
259 of York (UK), Centre for Injury Prevention and Rehabilitation (Bangladesh), Health Ministry Screening  
260 Committee and Indian Council of Medical Research (India) and National Bioethics Committee  
261 (Pakistan).

262 The study will adhere to the fundamental principles of human rights and dignity laid down in the  
263 Declaration of Helsinki<sup>44</sup>. Study procedures will comply with legislation and guidance for good practice  
264 governing the participation in research of people lacking capacity as set out in the Mental Capacity Act  
265 (UK) 2005<sup>45</sup>. Participants will not receive any financial inducement to participate, but the results of the  
266 physical measurements and blood tests will be shared with the participant and the treating clinician.

267 As a non-interventional study, there is minimal risk of adverse events associated with the study. Due to  
268 the vulnerability of the severe mental illness population, however, there is a potential (albeit low) risk  
269 that some questions or the burden of the assessments may cause distress for participants or the family  
270 carers. If there is any indication of this, the survey or assessments will be stopped, the participant  
271 offered reassurance and support, and if needed, referral to the clinical team. If a participant during the  
272 interview reveals any suicidal ideation, the interviewer will refer them to the treating clinician for a  
273 clinical risk assessment and further management. If a physical condition or blood test abnormality  
274 (outside the normal range for age and sex) is detected as a part of the research assessments, the  
275 research team will inform the clinician responsible for the patient, who will evaluate the result and give  
276 the patient the option of referral to a specialist if this is required for their condition.

## 277 **Community, patient and public involvement**

278 A 'Community Panel' comprising stakeholders from these constituencies ensures community, patient  
279 and public involvement. The Panel has reviewed the planned survey and advised on its feasibility. The  
280 panel will continue to provide feedback on the conduct of the study and presentation of findings. To  
281 support dissemination efforts, findings will be presented to the community panel, with advice sought  
282 about the format and content of lay summaries and other outputs aimed at patients and the public.

## 283 **Dissemination**

284 Findings will be disseminated in peer-reviewed articles, in local and international conferences and as  
285 reports for policy makers and stakeholders in the countries involved.

## 286 **Discussion**

287 People with SMI have a reduced life expectancy. Research in high income countries has shown that a  
288 large proportion of this inequality is accounted for by chronic diseases<sup>1 2</sup>. This has been consistently  
289 observed in high income countries<sup>6 7</sup>. However information is lacking in minority groups and LMICs,  
290 which is surprising considering the increased risk of physical health conditions in these populations due  
291 to poverty, education, poor diet, low access to healthcare, exposure to infectious diseases and other  
292 environmental factors<sup>46</sup>. The IMPACT SMI survey will address this gap in knowledge, demonstrating  
293 the prevalence of different physical health conditions and health-risk behaviours in the SMI population,  
294 and the influence of each of these conditions in terms of health related quality of life. It will support  
295 SMI clinical trial readiness by providing evidence-based findings regarding outcome measures and  
296 procedures relevant for clinical trials design.

### 297 **Strengths and limitations**

298 To the best of the authors' knowledge, this will be the first large scale study to investigate the physical  
299 health and health-risk behaviours in the SMI population in LMICs. The main limitation is that the survey  
300 is conducted in specialist centres (with patients with capacity) and is therefore a health care utilisation  
301 sample drawn largely from tertiary care. The gaps in treatment and care utilisation and systematic  
302 factors influencing these have been well documented (e.g.<sup>47</sup>), therefore, the study population may not  
303 be representative of the total severe mental illness population in each country. However, a community  
304 survey would not be feasible, and primary and secondary care mental health services are not  
305 sufficiently developed to be used to recruit participants for this survey (see for example work by PRIME  
306<sup>15</sup> and Emerald<sup>48</sup> programmes on strengthening these services as access points). However, unlike  
307 services in high-income countries, tertiary care services in these South Asian countries accept self-  
308 referral without the need for primary or secondary care referral and we include outpatient services  
309 offered by the collaborating centres which often function as 'the first port of call' for people with mental  
310 illness<sup>49-51</sup>. Therefore, the selected centres are likely covering a broad range of the treatment-seeking  
311 population.

### 312 **Conclusion**

313 Multimorbidity in people with SMI is not well documented particularly in low- and middle-income  
314 countries. The IMPACT survey will be the first to study it using a standardised approach in South Asia  
315 that can be compared to the general population.

### 316 **Acknowledgements**

317 We would like to acknowledge Dr Sue Bellass, Prof. Santosh Kumar Chaturvedi, Dr Arun Kandasamy, Dr  
318 Noreen Mdege, Dr Masuma Mishu, Dr Emily Peckham, Prof. Simon Gilbody and the research teams at  
319 ARK foundation and The National Institute of Mental Health (NIMH) in Bangladesh, Institute of  
320 Psychiatry in Pakistan (IoP) and The National Institute of Mental Health and Neuro-Sciences (NIMHANS)  
321 in India for their contribution to the study. We want to thank all the participants and caregivers for  
322 taking the time to complete the survey.

### 323 **References**

- 324 1. Liu NH, Daumit GL, Dua T, et al. Excess mortality in persons with severe mental disorders: a multilevel  
325 intervention framework and priorities for clinical practice, policy and research agendas. *World*  
326 *psychiatry : official journal of the World Psychiatric Association (WPA)* 2017;16(1):30-40. doi:  
327 10.1002/wps.20384 [published Online First: 2017/01/28]
- 328 2. Walker ER, McGee RE, Druss BG. Mortality in mental disorders and global disease burden  
329 implications: a systematic review and meta-analysis. *JAMA psychiatry* 2015;72(4):334-41. doi:  
330 10.1001/jamapsychiatry.2014.2502 [published Online First: 2015/02/12]
- 331 3. Olfson M, Gerhard T, Huang C, et al. Premature Mortality Among Adults With Schizophrenia in the  
332 United States. *JAMA psychiatry* 2015;72(12):1172-81. doi: 10.1001/jamapsychiatry.2015.1737  
333 [published Online First: 2015/10/29]
- 334 4. Saha S, Chant D, McGrath J. A systematic review of mortality in schizophrenia: is the differential  
335 mortality gap worsening over time? *Archives of general psychiatry* 2007;64(10):1123-31. doi:  
336 10.1001/archpsyc.64.10.1123 [published Online First: 2007/10/03]
- 337 5. Chesney E, Goodwin GM, Fazel S. Risks of all-cause and suicide mortality in mental disorders: a meta-  
338 review. *World psychiatry : official journal of the World Psychiatric Association (WPA)* 2014;13(2):153-  
339 60. doi: 10.1002/wps.20128 [published Online First: 2014/06/04]
- 340 6. Laursen TM. Life expectancy among persons with schizophrenia or bipolar affective disorder.  
341 *Schizophrenia research* 2011;131(1-3):101-4. doi: 10.1016/j.schres.2011.06.008 [published Online First:  
342 2011/07/12]
- 343 7. Fekadu A, Medhin G, Kebede D, et al. Excess mortality in severe mental illness: 10-year population-  
344 based cohort study in rural Ethiopia. *The British journal of psychiatry : the journal of mental science*  
345 2015;206(4):289-96. doi: 10.1192/bjp.bp.114.149112 [published Online First: 2015/02/07]

1  
2  
3  
4  
5  
6  
7  
8  
9  
10  
11  
12  
13  
14  
15  
16  
17  
18  
19  
20  
21  
22  
23  
24  
25  
26  
27  
28  
29  
30  
31  
32  
33  
34  
35  
36  
37  
38  
39  
40  
41  
42  
43  
44  
45  
46  
47  
48  
49  
50  
51  
52  
53  
54  
55  
56  
57  
58  
59  
60

- 346 8. Mai Q, Holman CD, Sanfilippo FM, et al. The impact of mental illness on potentially preventable  
347 hospitalisations: a population-based cohort study. *BMC psychiatry* 2011;11:163. doi: 10.1186/1471-  
348 244X-11-163 [published Online First: 2011/10/12]
- 349 9. Reilly S, Olier I, Planner C, et al. Inequalities in physical comorbidity: a longitudinal comparative  
350 cohort study of people with severe mental illness in the UK. *BMJ open* 2015;5(12):e009010. doi:  
351 10.1136/bmjopen-2015-009010 [published Online First: 2015/12/17]
- 352 10. Kurihara T, Kato M, Reverger R, et al. Seventeen-year clinical outcome of schizophrenia in Bali.  
353 *European psychiatry : the journal of the Association of European Psychiatrists* 2011;26(5):333-8. doi:  
354 10.1016/j.eurpsy.2011.04.003 [published Online First: 2011/06/24]
- 355 11. Mogga S, Prince M, Alem A, et al. Outcome of major depression in Ethiopia: population-based study.  
356 *The British journal of psychiatry : the journal of mental science* 2006;189:241-6. doi:  
357 10.1192/bjp.bp.105.013417 [published Online First: 2006/09/02]
- 358 12. Teferra S, Shibre T, Fekadu A, et al. Five-year mortality in a cohort of people with schizophrenia in  
359 Ethiopia. *BMC psychiatry* 2011;11:165. doi: 10.1186/1471-244x-11-165 [published Online First:  
360 2011/10/12]
- 361 13. Nambiar D, Razzak J, Afsana K, et al. Mental illness and injuries: emerging health challenges of  
362 urbanisation in South Asia. *bmj* 2017;357:j1126.
- 363 14. Misra A, Tandon N, Ebrahim S, et al. Diabetes, cardiovascular disease, and chronic kidney disease in  
364 South Asia: current status and future directions. *bmj* 2017;357:j1420.
- 365 15. Lund C, Tomlinson M, Patel V. Integration of mental health into primary care in low-and middle-  
366 income countries: the PRIME mental healthcare plans. *The British Journal of Psychiatry*  
367 2016;208(s56):s1-s3.
- 368 16. Shavitt S, Cho YI, Johnson TP, et al. Culture moderates the relation between perceived stress, social  
369 support, and mental and physical health. *Journal of Cross-Cultural Psychology* 2016;47(7):956-80.
- 370 17. Collins PY, Insel TR, Chockalingam A, et al. Grand challenges in global mental health: integration in  
371 research, policy, and practice. *PLoS Med* 2013;10(4):e1001434. doi: 10.1371/journal.pmed.1001434  
372 [published Online First: 2013/05/03]
- 373 18. Baingana F, al'Absi M, Becker AE, et al. Global research challenges and opportunities for mental  
374 health and substance-use disorders. *Nature* 2015;527(7578):S172-7. doi: 10.1038/nature16032  
375 [published Online First: 2015/11/19]
- 376 19. UN. Transforming our world: the 2030 Agenda for Sustainable Development. New York: United  
377 Nations, 2015.
- 378 20. Stubbs B, Koyanagi A, Veronese N, et al. Physical multimorbidity and psychosis: comprehensive  
379 cross sectional analysis including 242,952 people across 48 low-and middle-income countries. *BMC*  
380 *medicine* 2016;14(1):189.
- 381 21. Vancampfort D, Correll CU, Galling B, et al. Diabetes mellitus in people with schizophrenia, bipolar  
382 disorder and major depressive disorder: a systematic review and large scale meta-analysis. *World*  
383 *psychiatry : official journal of the World Psychiatric Association (WPA)* 2016;15(2):166-74. doi:  
384 10.1002/wps.20309 [published Online First: 2016/06/07]
- 385 22. Buderer NMF. Statistical methodology: I. Incorporating the prevalence of disease into the sample  
386 size calculation for sensitivity and specificity. *Academic Emergency Medicine* 1996;3(9):895-900.
- 387 23. Lecrubier Y, Sheehan DV, Weiller E, et al. The Mini International Neuropsychiatric Interview (MINI).  
388 A short diagnostic structured interview: reliability and validity according to the CID-I. *European*  
389 *Psychiatry* 1997;12(5):224-31. doi: [https://doi.org/10.1016/S0924-9338\(97\)83296-8](https://doi.org/10.1016/S0924-9338(97)83296-8)
- 390 24. Sheehan DV, Lecrubier Y, Harnett Sheehan K, et al. The validity of the Mini International  
391 Neuropsychiatric Interview (MINI) according to the SCID-P and its reliability. *European Psychiatry*  
392 1997;12(5):232-41. doi: [https://doi.org/10.1016/S0924-9338\(97\)83297-X](https://doi.org/10.1016/S0924-9338(97)83297-X)



- 1  
2  
3 393 25. Bonita R, Winkelmann R, Douglas KA, et al. The WHO Stepwise approach to surveillance (STEPS) of  
4 394 non-communicable disease risk factors. *Global behavioral risk factor surveillance*: Springer 2003:9-22.
- 5  
6 395 26. Bonita R, De Courten M, Dwyer T, et al. Surveillance of risk factors for noncommunicable diseases:  
7 396 the WHO STEPwise approach: summary: *Noncommunicable Diseases and Mental Health*, World Health  
8 397 Organization, 2001.
- 9 398 27. Nishtar S, Bile KM, Ahmed A, et al. Integrated population-based surveillance of noncommunicable  
10 399 diseases: the Pakistan model. *American journal of preventive medicine* 2005;29(5):102-06.
- 11  
12 400 28. Mohan V, Mathur P, Deepa R, et al. Urban rural differences in prevalence of self-reported diabetes  
13 401 in India—The WHO–ICMR Indian NCD risk factor surveillance. *Diabetes research and clinical practice*  
14 402 2008;80(1):159-68.
- 15 403 29. Zaman MM, Rahman MM, Rahman MR, et al. Prevalence of risk factors for non-communicable  
16 404 diseases in Bangladesh: results from STEPS survey 2010. *Indian J Public Health* 2016;60(1):17-25.
- 17  
18 405 30. Fulton SL, McKinley MC, Young IS, et al. The effect of increasing fruit and vegetable consumption  
19 406 on overall diet: a systematic review and meta-analysis. *Critical reviews in food science and nutrition*  
20 407 2016;56(5):802-16.
- 21 408 31. Cleland CL, Hunter RF, Kee F, et al. Validity of the global physical activity questionnaire (GPAQ) in  
22 409 assessing levels and change in moderate-vigorous physical activity and sedentary behaviour. *BMC*  
23 410 *public health* 2014;14(1):1255.
- 24  
25 411 32. Gerbert B, Bronstone A, McPhee S, et al. Development and testing of an HIV-risk screening  
26 412 instrument for use in health care settings. *American Journal of Preventive Medicine* 1998;15(2):103-13.
- 27 413 33. Chandra PS, Carey MP, Carey KB, et al. HIV risk behaviour among psychiatric inpatients: results from  
28 414 a hospital-wide screening study in southern India. *International journal of STD & AIDS* 2003;14(8):532-  
29 415 38.
- 30 416 34. Kroenke K, Spitzer RL. The PHQ-9: a new depression diagnostic and severity measure. *Psychiatric*  
31 417 *annals* 2002;32(9):509-15.
- 32  
33 418 35. Löwe B, Decker O, Müller S, et al. Validation and standardization of the Generalized Anxiety Disorder  
34 419 Screener (GAD-7) in the general population. *Medical care* 2008;46(3):266-74.
- 35 420 36. Hurst NP, Kind P, Ruta D, et al. Measuring health-related quality of life in rheumatoid arthritis:  
36 421 validity, responsiveness and reliability of EuroQol (EQ-5D). *British journal of rheumatology*  
37 422 1997;36(5):551-9.
- 38 423 37. EuroQol Group. EQ-5D-5L User Guide: Basic information on how to use the EQ-5D-5L instrument  
39 424 (version 2.0) 2013 04/03/2015. 1990.  
40 425 [http://www.euroqol.org/fileadmin/user\\_upload/Documenten/PDF/Folders\\_Flyers/UserGuide\\_EQ-](http://www.euroqol.org/fileadmin/user_upload/Documenten/PDF/Folders_Flyers/UserGuide_EQ-5D-5L_v2.0_October_2013.pdf)  
41 426 [5D-5L\\_v2.0\\_October\\_2013.pdf](http://www.euroqol.org/fileadmin/user_upload/Documenten/PDF/Folders_Flyers/UserGuide_EQ-5D-5L_v2.0_October_2013.pdf). (accessed 09/05/2017).
- 42  
43 427 38. Organization WH. WHO STEPS surveillance manual: the WHO STEPwise approach to chronic disease  
44 428 risk factor surveillance: Geneva: World Health Organization, 2005.
- 45  
46 429 39. Corti L, Van den Eynden V, Bishop L, et al. Managing and sharing research data: a guide to good  
47 430 practice: Sage 2014.
- 48  
49 431 40. Kossakowski JJ, Epskamp S, Kieffer JM, et al. The application of a network approach to Health-  
50 432 Related Quality of Life (HRQoL): introducing a new method for assessing HRQoL in healthy adults and  
51 433 cancer patients. *Quality of Life Research* 2016;25(4):781-92.
- 52  
53 434 41. Böhnke J, Croudace TJ. Factors of psychological distress: clinical value, measurement substance,  
54 435 and methodological artefacts. *Social psychiatry and psychiatric epidemiology* 2015;50(4):515-24.
- 55 436 42. Eaton NR, Rodriguez-Seijas C, Carragher N, et al. Transdiagnostic factors of psychopathology and  
56 437 substance use disorders: a review. *Social psychiatry and psychiatric epidemiology* 2015;50(2):171-82.
- 57  
58 438 43. Goldberg D. Psychopathology and classification in psychiatry. *Social psychiatry and psychiatric*  
59 439 *epidemiology* 2015;50(1):1-5.
- 60

- 1  
2  
3 440 44. Williams JR. The Declaration of Helsinki and public health. *Bulletin of the World Health Organization*  
4 441 2008;86:650-52.  
5  
6 442 45. Boyle G. The Mental Capacity Act 2005: promoting the citizenship of people with dementia? *Health*  
7 443 *& social care in the community* 2008;16(5):529-37.  
8  
9 444 46. Allen L, Williams J, Townsend N, et al. Socioeconomic status and non-communicable disease  
10 445 behavioural risk factors in low-income and lower-middle-income countries: a systematic review. *The*  
11 446 *Lancet Global Health* 2017;5(3):e277-e89.  
12  
13 447 47. Evans-Lacko S, Aguilar-Gaxiola S, Al-Hamzawi A, et al. Socio-economic variations in the mental  
14 448 health treatment gap for people with anxiety, mood, and substance use disorders: results from the  
15 449 WHO World Mental Health (WMH) surveys. *Psychol Med* 2018;48(9):1560-71. doi:  
16 450 10.1017/s0033291717003336 [published Online First: 2017/11/28]  
17  
18 451 48. Semrau M, Evans-Lacko S, Alem A, et al. Strengthening mental health systems in low-and middle-  
19 452 income countries: the Emerald programme. *BMC medicine* 2015;13(1):79.  
20  
21 453 49. Afsar HA, Younus M. Patient referral at the grass-roots level in Pakistan. *Nat Sci(Internet)*  
22 454 2004;2(4):18-27.  
23  
24 455 50. Karim S, Saeed K, Rana MH, et al. Pakistan mental health country profile. *International Review of*  
25 456 *Psychiatry* 2004;16(1-2):83-92.  
26  
27 457 51. Organization WH. Bangladesh health system review: Manila: WHO Regional Office for the Western  
28 458 Pacific 2015.  
29 459

#### 460 **Authors' contributions**

461 NS conceived the study, KP, FA, DB, RH, SM, PM, AN, SK and KS provided important contextual  
462 information, KP, FP, DB, RH, SM, NS and JB developed the methodology and selected the outcomes,  
463 GZ, AH, KH and JB developed the analysis plan, GZ, NS, KS and JB wrote the manuscript, and all authors  
464 revised and approved the manuscript.

#### 465 **Funding statement**

466 This research was funded by the National Institute for Health Research (NIHR) (17/63/130) using UK aid  
467 from the UK Government to support global health research. The views expressed in this publication are  
468 those of the author(s) and not necessarily those of the NIHR or the UK Department of Health and Social  
469 Care. The funders had no role in study design, data collection and analysis, decision to publish, or  
470 preparation of the manuscript.

#### 471 **Competing interests statement**

472 The authors declare that they have no competing interests

#### 474 **Word count**

475 3159 words

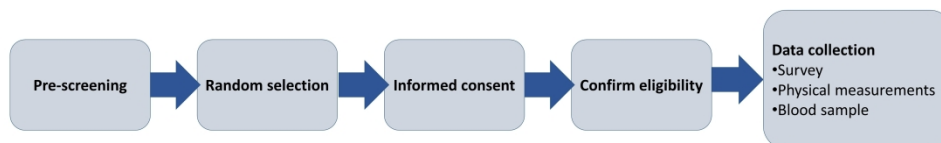

Figure 1. Flow diagram of the study

1399x600mm (96 x 96 DPI)



## INVESTIGATING MENTAL AND PHYSICAL COMORBIDITY: Protocol for a survey in people with severe mental illness in South Asia (IMPACT SMI survey)

STROBE Statement—Checklist of items that should be included in reports of *cross-sectional studies*

|                              | Item No | Recommendation                                                                                                                                                                                                                                   |
|------------------------------|---------|--------------------------------------------------------------------------------------------------------------------------------------------------------------------------------------------------------------------------------------------------|
| <b>Title and abstract</b>    | 1       | (a) Indicate the study's design with a commonly used term in the title or the abstract<br><b>Title and abstract lines 1 to 56</b>                                                                                                                |
|                              |         | (b) Provide in the abstract an informative and balanced summary of what was done and what was found<br><b>Abstract lines 32 to 56</b>                                                                                                            |
| <b>Introduction</b>          |         |                                                                                                                                                                                                                                                  |
| Background/rationale         | 2       | Explain the scientific background and rationale for the investigation being reported<br><b>Background paragraphs 1 to 3</b>                                                                                                                      |
| Objectives                   | 3       | State specific objectives, including any prespecified hypotheses<br><b>Background, objectives section lines 93 to 101</b>                                                                                                                        |
| <b>Methods</b>               |         |                                                                                                                                                                                                                                                  |
| Study design                 | 4       | Present key elements of study design early in the paper<br><b>Methods paragraph 1 design setting and population 103 to 115</b>                                                                                                                   |
| Setting                      | 5       | Describe the setting, locations, and relevant dates, including periods of recruitment, exposure, follow-up, and data collection<br><b>Methods paragraph 1 design setting and population lines 103 to 115</b>                                     |
| Participants                 | 6       | (a) Give the eligibility criteria, and the sources and methods of selection of participants<br><b>Methods paragraph 1 design setting and population lines 103 to 115</b>                                                                         |
| Variables                    | 7       | Clearly define all outcomes, exposures, predictors, potential confounders, and effect modifiers. Give diagnostic criteria, if applicable<br><b>Methods, data collection section lines 158 to 231</b>                                             |
| Data sources/<br>measurement | 8*      | For each variable of interest, give sources of data and details of methods of assessment (measurement). Describe comparability of assessment methods if there is more than one group<br><b>Methods, data collection section lines 158 to 231</b> |
| Bias                         | 9       | Describe any efforts to address potential sources of bias<br><b>Discussion, strengths and limitation section lines 297 to 307</b>                                                                                                                |
| Study size                   | 10      | Explain how the study size was arrived at<br><b>Methods section Sample size lines 298 to 311</b>                                                                                                                                                 |
| Quantitative variables       | 11      | Explain how quantitative variables were handled in the analyses. If applicable, describe which groupings were chosen and why<br><b>NA</b>                                                                                                        |
| Statistical methods          | 12      | (a) Describe all statistical methods, including those used to control for confounding<br><b>Methods Statistical analysis section lines 240 to 255</b>                                                                                            |
|                              |         | (b) Describe any methods used to examine subgroups and interactions<br><b>Methods Statistical analysis section lines 240 to 255</b>                                                                                                              |
|                              |         | (c) Explain how missing data were addressed<br><b>NA</b>                                                                                                                                                                                         |
|                              |         | (d) If applicable, describe analytical methods taking account of sampling strategy<br><b>Methods, Recruitment and random selection of the participants lines 123 to 126</b>                                                                      |
|                              |         | (e) Describe any sensitivity analyses                                                                                                                                                                                                            |

---

**Methods Statistical analysis section lines 239 to 255**


---

| <b>Results</b>           |     |                                                                                                                                                                                                                                                                                                                                                                                                                     |
|--------------------------|-----|---------------------------------------------------------------------------------------------------------------------------------------------------------------------------------------------------------------------------------------------------------------------------------------------------------------------------------------------------------------------------------------------------------------------|
| Participants             | 13* | (a) Report numbers of individuals at each stage of study—eg numbers potentially eligible, examined for eligibility, confirmed eligible, included in the study, completing follow-up, and analysed<br>NA<br>(b) Give reasons for non-participation at each stage<br>NA<br>(c) Consider use of a flow diagram<br>NA                                                                                                   |
| Descriptive data         | 14* | (a) Give characteristics of study participants (eg demographic, clinical, social) and information on exposures and potential confounders<br>(b) Indicate number of participants with missing data for each variable of interest<br>NA                                                                                                                                                                               |
| Outcome data             | 15* | Report numbers of outcome events or summary measures<br>NA                                                                                                                                                                                                                                                                                                                                                          |
| Main results             | 16  | (a) Give unadjusted estimates and, if applicable, confounder-adjusted estimates and their precision (eg, 95% confidence interval). Make clear which confounders were adjusted for and why they were included<br>(b) Report category boundaries when continuous variables were categorized<br>(b) If relevant, consider translating estimates of relative risk into absolute risk for a meaningful time period<br>NA |
| Other analyses           | 17  | Report other analyses done—eg analyses of subgroups and interactions, and sensitivity analyses<br>NA                                                                                                                                                                                                                                                                                                                |
| <b>Discussion</b>        |     |                                                                                                                                                                                                                                                                                                                                                                                                                     |
| Key results              | 18  | Summarise key results with reference to study objectives<br>NA                                                                                                                                                                                                                                                                                                                                                      |
| Limitations              | 19  | Discuss limitations of the study, taking into account sources of potential bias or imprecision. Discuss both direction and magnitude of any potential bias<br>NA                                                                                                                                                                                                                                                    |
| Interpretation           | 20  | Give a cautious overall interpretation of results considering objectives, limitations, multiplicity of analyses, results from similar studies, and other relevant evidence<br>NA                                                                                                                                                                                                                                    |
| Generalisability         | 21  | Discuss the generalisability (external validity) of the study results<br>NA                                                                                                                                                                                                                                                                                                                                         |
| <b>Other information</b> |     |                                                                                                                                                                                                                                                                                                                                                                                                                     |
| Funding                  | 22  | Give the source of funding and the role of the funders for the present study and, if applicable, for the original study on which the present article is based<br>NA                                                                                                                                                                                                                                                 |

\*Give information separately for exposed and unexposed groups.

1  
2 **Note:** An Explanation and Elaboration article discusses each checklist item and gives methodological background and  
3 published examples of transparent reporting. The STROBE checklist is best used in conjunction with this article (freely  
4 available on the Web sites of PLoS Medicine at <http://www.plosmedicine.org/>, Annals of Internal Medicine at  
5 <http://www.annals.org/>, and Epidemiology at <http://www.epidem.com/>). Information on the STROBE Initiative is  
6 available at [www.strobe-statement.org](http://www.strobe-statement.org).  
7  
8  
9  
10  
11  
12  
13  
14  
15  
16  
17  
18  
19  
20  
21  
22  
23  
24  
25  
26  
27  
28  
29  
30  
31  
32  
33  
34  
35  
36  
37  
38  
39  
40  
41  
42  
43  
44  
45  
46  
47  
48  
49  
50  
51  
52  
53  
54  
55  
56  
57  
58  
59  
60

For peer review only

# BMJ Open

## Prevalence of physical health conditions and health risk behaviours in people with severe mental illness in South Asia: Protocol for a cross-sectional study (IMPACT SMI survey)

|                                 |                                                                                                                                                                                                                                                                                                                                                                                                                                                                                                                                                                                                                                                                                                                                                                                                                                                                                 |
|---------------------------------|---------------------------------------------------------------------------------------------------------------------------------------------------------------------------------------------------------------------------------------------------------------------------------------------------------------------------------------------------------------------------------------------------------------------------------------------------------------------------------------------------------------------------------------------------------------------------------------------------------------------------------------------------------------------------------------------------------------------------------------------------------------------------------------------------------------------------------------------------------------------------------|
| Journal:                        | <i>BMJ Open</i>                                                                                                                                                                                                                                                                                                                                                                                                                                                                                                                                                                                                                                                                                                                                                                                                                                                                 |
| Manuscript ID                   | bmjopen-2020-037869.R1                                                                                                                                                                                                                                                                                                                                                                                                                                                                                                                                                                                                                                                                                                                                                                                                                                                          |
| Article Type:                   | Protocol                                                                                                                                                                                                                                                                                                                                                                                                                                                                                                                                                                                                                                                                                                                                                                                                                                                                        |
| Date Submitted by the Author:   | 13-Jun-2020                                                                                                                                                                                                                                                                                                                                                                                                                                                                                                                                                                                                                                                                                                                                                                                                                                                                     |
| Complete List of Authors:       | Zavala, Gerardo A.; University of York, Prasad, Krishna; National Institute of Mental Health and Neuro Sciences<br>Aslam, Faiza; Institute of Psychiatry<br>Barua, Deepa; ARK Foundation<br>Haidar, Asiful; ARK Foundation<br>Hewitt, Catherine; The University of York, Health Sciences<br>Huque, Rumana; ARK Foundation<br>Mansoor, Sonia; Institute of Psychiatry<br>Murthy, Pratima; National Institute of Mental Health and NeuroSciences, Centre for Addiction Medicine<br>Nizami, Asad; Institute of Psychiatry<br>Siddiqi, Najma; University of York, Psychiatry, Hull York Medical School, York and Bradford District Care NHS Foundation Trust, Bradford, UK<br>Sikander, Siham; Health Services Academy<br>Siddiqi, Kamran; University of York, UK, Institute of Health Sciences<br>Boehnke, Jan Rasmus; University of Dundee, School of Nursing and Health Sciences |
| <b>Primary Subject Heading</b>: | Global health                                                                                                                                                                                                                                                                                                                                                                                                                                                                                                                                                                                                                                                                                                                                                                                                                                                                   |
| Secondary Subject Heading:      | Global health, Mental health, Epidemiology, Public health                                                                                                                                                                                                                                                                                                                                                                                                                                                                                                                                                                                                                                                                                                                                                                                                                       |
| Keywords:                       | MENTAL HEALTH, Schizophrenia & psychotic disorders < PSYCHIATRY, PSYCHIATRY                                                                                                                                                                                                                                                                                                                                                                                                                                                                                                                                                                                                                                                                                                                                                                                                     |
|                                 |                                                                                                                                                                                                                                                                                                                                                                                                                                                                                                                                                                                                                                                                                                                                                                                                                                                                                 |

SCHOLARONE™  
Manuscripts



I, the Submitting Author has the right to grant and does grant on behalf of all authors of the Work (as defined in the below author licence), an exclusive licence and/or a non-exclusive licence for contributions from authors who are: i) UK Crown employees; ii) where BMJ has agreed a CC-BY licence shall apply, and/or iii) in accordance with the terms applicable for US Federal Government officers or employees acting as part of their official duties; on a worldwide, perpetual, irrevocable, royalty-free basis to BMJ Publishing Group Ltd ("BMJ") its licensees and where the relevant Journal is co-owned by BMJ to the co-owners of the Journal, to publish the Work in this journal and any other BMJ products and to exploit all rights, as set out in our [licence](#).

The Submitting Author accepts and understands that any supply made under these terms is made by BMJ to the Submitting Author unless you are acting as an employee on behalf of your employer or a postgraduate student of an affiliated institution which is paying any applicable article publishing charge ("APC") for Open Access articles. Where the Submitting Author wishes to make the Work available on an Open Access basis (and intends to pay the relevant APC), the terms of reuse of such Open Access shall be governed by a Creative Commons licence – details of these licences and which [Creative Commons](#) licence will apply to this Work are set out in our licence referred to above.

Other than as permitted in any relevant BMJ Author's Self Archiving Policies, I confirm this Work has not been accepted for publication elsewhere, is not being considered for publication elsewhere and does not duplicate material already published. I confirm all authors consent to publication of this Work and authorise the granting of this licence.

1  
2  
3 **1 Prevalence of physical health conditions and health risk behaviours in people with severe mental**  
4 **2 illness in South Asia: Protocol for a cross-sectional study (IMPACT SMI survey)**

5  
6 3 G.A. Zavala<sup>1</sup>, K. Prasad-Muliyala<sup>2</sup>, F. Aslam<sup>3</sup>, D. Barua<sup>4</sup>, A. Haidar<sup>4</sup> C. Hewitt<sup>1</sup>, R. Huque<sup>4</sup>, S. Mansoor<sup>3</sup>, P.  
7 4 Murthy<sup>2</sup>, A. T. Nizami<sup>3</sup>, N. Siddiqi<sup>1,5,6</sup>, S. Sikander<sup>7,8</sup>, K. Siddiqi<sup>1,5</sup>, J.R. Boehnke<sup>1,9</sup> and on behalf of the  
8 5 IMPACT team.

9 **6 Affiliations**

10  
11 7 <sup>1</sup>Department of Health Sciences, University of York, Heslington, YO10 5DD, York, UK

12 8 <sup>2</sup> National Institute of Mental Health and Neurosciences (NIMHANS), Bangalore, India.

13  
14 9 <sup>3</sup> Institute of Psychiatry (IOP), Rawalpindi Medical University, Rawalpindi, Pakistan

15  
16 10 <sup>4</sup>ARK Foundation, Dhaka, Bangladesh

17 11 <sup>5</sup> Hull York Medical School, University of York Communications Office, Heslington, York, UK

18 12 <sup>6</sup> Bradford District Care NHS Foundation Trust, Bradford, UK

19  
20 13 <sup>7</sup> Human Development Research Foundation, Islamabad, Pakistan

21 14 <sup>8</sup>Public Health, Health Services Academy, Islamabad, Pakistan

22  
23 15 <sup>9</sup>School of Health Sciences, University of Dundee, Dundee, UK

24 16 G.A. Zavala <https://orcid.org/0000-0002-9825-8725> Corresponding author: [gavala@gmail.com](mailto:gavala@gmail.com)

25  
26 17 K. Prasad-Muliyala <https://orcid.org/0000-0002-2580-9581>

27 18 F. Aslam <https://orcid.org/0000-0002-7847-7250>

28  
29 19 D. Barua <https://orcid.org/0000-0002-0122-9048>

30 20 A. Haidar <https://orcid.org/0000-0001-9015-4414>

31 21 C. Hewitt <https://orcid.org/0000-0002-0415-3536>

32 22 R. Huque <http://orcid.org/0000-0003-4724-0581>

33 23 S. Mansoor <http://orcid.org/0000-0002-9837-6852>

34 24 P. Murthy <https://orcid.org/0000-0002-7738-9670>

35 25 A. T. Nizami <https://orcid.org/0000-0002-7853-8519>

36 26 N. Siddiqi <https://orcid.org/0000-0003-1794-2152>

37 27 S. Sikander <https://orcid.org/0000-0002-0223-7234>

38 28 K. Siddiqi <https://orcid.org/0000-0003-1529-7778>

39  
40  
41  
42  
43  
44 29 J.R. Boehnke <https://orcid.org/0000-0003-0249-1870>

1  
2  
3  
4  
5  
6  
7  
8  
9  
10  
11  
12  
13  
14  
15  
16  
17  
18  
19  
20  
21  
22  
23  
24  
25  
26  
27  
28  
29  
30  
31  
32  
33  
34  
35  
36  
37  
38  
39  
40  
41  
42  
43  
44  
45  
46  
47  
48  
49  
50  
51  
52  
53  
54  
55  
56

## 31 Abstract

32 **Introduction:** People with severe mental illness (SMI) die on average 10-20 years earlier than the  
33 general population. Most of these deaths are due to physical health conditions. The aim of this cross-  
34 sectional study is to determine the prevalence of physical health conditions and their associations with  
35 health-risk behaviours, health-related quality of life and various demographic, behavioural, cognitive,  
36 psychological and social variables in people with SMI attending specialist mental health facilities in  
37 South Asia.

38 **Methods and analysis:** We will conduct a survey of patients with SMI attending specialist mental health  
39 facilities in Bangladesh, India and Pakistan (n=4,500). Diagnosis of SMI will be confirmed using the MINI  
40 V-6.0. We will collect information about: physical health and related health-risk behaviours (WHO  
41 STEPs); severity of common mental disorders (PHQ-9 and GAD-7); and health-related quality of life (EQ-  
42 5D-5L). We will measure blood pressure, height, weight and waist-circumference according to WHO  
43 guidelines. We will also measure glycated haemoglobin (HbA1c), lipid profile, thyroid function, liver  
44 function, creatinine and haemoglobin. Prevalence rates of physical health conditions and health-risk  
45 behaviours will be presented and compared with the WHO STEPs survey findings in the general  
46 population. Regression analyses will explore the association between health-risk behaviours, mental  
47 and physical health conditions.

48 **Ethics and dissemination:** The study has been approved by the ethics committees of the Department  
49 of Health Sciences University of York (UK), Centre for Injury Prevention and Rehabilitation (Bangladesh),  
50 Health Ministry Screening Committee and Indian Council of Medical Research (India) and National  
51 Bioethics Committee (Pakistan). Findings will be disseminated in peer reviewed articles, in local and  
52 international conferences and as reports for policy makers and stakeholders in the countries involved.

53 **Trial registration:** ISRCTN88485933; <https://doi.org/10.1186/ISRCTN88485933>, 3rd of June 2019

54 **Key words:** Multimorbidity, Comorbidity, Lifestyle, Severe mental illness, South Asia, health risk  
55 behaviours, schizophrenia, bipolar disorders, psychosis

1  
2  
3  
4  
5  
6  
7  
8  
9  
10  
11  
12  
13  
14  
15  
16  
17  
18  
19  
20  
21  
22  
23  
24  
25  
26  
27  
28  
29  
30  
31  
32  
33  
34  
35  
36  
37  
38  
39  
40  
41  
42  
43  
44  
45  
46  
47  
48  
49  
50  
51  
52  
53  
54  
55  
56  
57  
58  
59  
60  
61  
62  
63  
64  
65  
66  
67

57 **Article summary**

58 ***Strengths and limitations***

- 59 • The study uses standardized tools to measure patient outcomes that will allow us to compare  
60 the findings with those of the general population.
- 61 • The survey will be conducted face to face by trained researchers
- 62 • The questionnaire has been translated into the most common languages used in Bangladesh  
63 India and Pakistan using validated translations of standardized measures where available.
- 64 • The survey is being conducted in specialist centres and is therefore a health care utilisation  
65 sample drawn largely from tertiary care.
- 66 • The study population may not be representative of all the people with severe mental illness in  
67 each country, as those not accessing specialist centres are not included in the survey.



## 69 Background

70 A considerable body of research has shown that people with severe mental illness (SMI; i.e. psychotic  
71 disorders, bipolar affective disorder and severe depression with psychotic symptoms) die on average  
72 10-20 years earlier than the general population<sup>1,2</sup>. Around 80% of deaths in people with SMI are due  
73 to preventable physical illnesses, most commonly cardio-metabolic diseases, respiratory disorders, and  
74 infectious diseases<sup>3,4</sup>. This excess mortality is a major global public health challenge but efforts to  
75 address it have been limited. Recent studies suggest that despite an overall improvement in life  
76 expectancy for both the general population and people with SMI, the absolute mortality gap between  
77 these two groups is actually widening<sup>5-7</sup>.

78 Prevalence of most physical health conditions is higher and outcomes are poorer in this population<sup>8</sup>.  
79 Multimorbidity (the presence of two or more conditions) is also more common<sup>9</sup> in the presence of SMI,  
80 contributing to poorer physical health and quality of life. The majority of evidence for these health  
81 inequalities has been generated in high-income countries (HICs), but a small number of studies from  
82 low- and middle-income countries (LMICs) also show a similar pattern of increased mortality for people  
83 with SMI, with an even shorter life expectancy, and larger mortality gap<sup>4,10-12</sup>. The few studies available  
84 suggest that physical comorbidity in SMI is at least as prevalent as in developed countries<sup>1</sup>.

85 In South Asia, rates of mental illness and physical non-communicable diseases have been increasing  
86 rapidly<sup>13,14</sup>. This increase, coupled with the lack of access to even basic mental healthcare<sup>15</sup>, and  
87 neglect of the physical health needs of people with SMI by policymakers and healthcare services<sup>16</sup>,  
88 means that the burden of disease due to physical disorders in people with mental illness is set to rise  
89 further, with a corresponding increase within country and global health inequalities. This increase is  
90 coupled with a recognized lack of information about the prevalence of physical conditions and health  
91 risk behaviours in the SMI population in South Asia<sup>17</sup>. This gap in knowledge, particularly in relation to  
92 health service planning in LMICs, has been pointed out repeatedly as a priority for research<sup>18</sup>.  
93 Addressing mental and physical health comorbidity in LMICs is also a global priority, recognized in global  
94 policies to help achieve the Sustainable Development Goals, including “ensuring healthy lives and  
95 promoting well-being for all”<sup>19-21</sup>. A detailed understanding of the prevalence of physical health  
96 conditions, health risk behaviours and health service utilization in SMI in LMICs is needed to progress  
97 this agenda<sup>22</sup>.

## 98 Objectives

99 In people with SMI attending specialist mental health facilities:

- 100 1. Determine the prevalence of physical health conditions (i.e. type 2 diabetes, hypertension,  
101 heart disease, obesity and infectious diseases) and health-risk behaviours (i.e. diet, physical  
102 activity, alcohol and tobacco use) and compare these findings with those reported in the  
103 general population.
- 104 2. Determine the association between physical health conditions, health-risk behaviours, health-  
105 related quality of life and various demographic, behavioural, cognitive, psychological and  
106 social variables.
- 107 3. Identify health-service utilization and the type of lifestyle advice that has been offered for this  
108 SMI population.
- 109 4. Support clinical trial readiness by providing evidence-based findings regarding outcome  
110 measures and procedures relevant for clinical trials design.

## 111 Methods and analysis

### 112 Design, settings & population

113 We will conduct a cross-sectional survey among patients with a clinical diagnosis of SMI recruited at  
114 national specialist mental health institutions. In Bangladesh the study will be conducted at the National  
115 Institute of Mental Health and Hospital (NIMH) in Dhaka. NIMH offers 200 beds for in-patient care  
116 and on average 400 out-patients attend every day. In India the study will be conducted at the National  
117 Institute of Mental Health and Neurosciences (NIMHANS) in Bengaluru, with 650 beds for in-patient  
118 care; on average at NIMHANS 400 out-patients attend every day. In Pakistan, the study will be

1  
2  
3 119 conducted at the Institute of Psychiatry (IOP) Rawalpindi Medical University, a WHO collaborating  
4 120 centre for the Eastern Mediterranean (EMRO). IOP offers 60 beds for inpatients and on average 400  
5 121 out-patients attend every day. All three national institutes serve patients from all over the country.  
6 122 Adults (18 years and over) with a clinical diagnosis of SMI (defined by the International Classification of  
7 123 Disease 10<sup>th</sup> revision (ICD-10<sup>23</sup>) as schizophrenia, schizotypal and delusional disorders (F20-F29); bipolar  
8 124 affective disorder (F30, F31); and severe depression with psychotic symptoms (F32.3, F33.3)<sup>23</sup>, who  
9 125 are able to provide informed consent as assessed by the treating clinician will be recruited. Patients  
10 126 who lack capacity to provide consent or are unable to complete study questionnaires will be excluded  
11 127 (figure 1). The data will be collected from June 2019 until September 2020.

### 128 **Sample size**

129 We aim to build as large a sample as possible within the resources available over the study period  
130 (n=1500 per country). As an indicative example of survey precision to address some of the key research  
131 questions, we provide a sample size estimate for investigating the prevalence of diabetes. Assuming a  
132 prevalence estimate of 10% (based on results from previous studies <sup>24</sup>), we will need 857 participants  
133 per country to achieve  $\pm 2\%$  precision assuming a 95% confidence interval<sup>25</sup>.

### 134 **Recruitment and random selection of the participants**

135 Both in- and outpatients attending one of the three specialist mental health institutions collaborating  
136 in this study will be recruited. At NIMHH and NIMHANS patients will be selected randomly using random  
137 number tables generated centrally to determine for outpatients, which patient to approach on a given  
138 day, and for inpatients by randomly selecting beds. Recruitment is separated by in- vs outpatients,  
139 resulting in a proportion of 80% outpatients and 20% inpatients (which has been reported as the  
140 "usual" proportion of in- and outpatients). Due to the lower volume of patients and outpatients  
141 reaching the centre outside working hours at the IOP, all patients attending the IOP during the study  
142 duration will be invited to participate in the survey.

### 143 **Informed consent**

144 In the first instance, the researchers will give an information sheet to the patient, providing written and  
145 verbal information on the potential benefits and risks of taking part in the study and clarifying the  
146 assessments involved in the study. Only people who provided written informed consent will be included  
147 in the study. Where there are problems with literacy, the researchers will provide this information  
148 verbally to both the carer and the patient. Those unable to provide a signature will be requested to  
149 indicate their consent with a thumbprint. The information sheet will meet all the requirements of the  
150 relevant ethics committees. Maintenance of confidentiality and compliance with international, UK and  
151 relevant local Data Protection Acts will be emphasised to all study participants. Moreover, all  
152 participants will be informed that their participation in the study is voluntary, consent can be  
153 withdrawn at any stage and the decision about participation will not affect their care.

154 Mental capacity is time- and decision-specific. For patients who are assessed to lack capacity by their  
155 local physician, seeking informed consent will be delayed until capacity is regained, if feasible. No  
156 assessments will be continued where the patient appears reluctant, even where patient consent has  
157 been obtained.

158 Optional 'consent to contact' about future studies will be sought from survey participants. Permission  
159 will be sought to retain participant details and to contact participants about future studies that may be  
160 relevant for them. Again, it will be emphasised that this is voluntary, they can withdraw permission at  
161 any time, and this will not affect their care in any way. After consenting to participate, the participant  
162 will be given a unique patient identifier (ID) by the researcher. The patient consent and contact  
163 information will be entered into a database (participant log), which will be kept separate from the  
164 survey results database. The survey results database will include only the unique patient ID, and no  
165 patient identifiable data.

### 166 **Confirmation of eligibility**

167 SMI diagnosis will be confirmed by trained researchers using the relevant modules from the Mini-  
168 international neuropsychiatric interview (MINI) version 6.0 <sup>26</sup>. The MINI is a short diagnostic structured  
169 interview to explore mental disorders. It is designed to allow administration by non-specialist

1  
2  
3  
4  
5  
6  
7  
8  
9  
10  
11  
12  
13  
14  
15  
16  
17  
18  
19  
20  
21  
22  
23  
24  
25  
26  
27  
28  
29  
30  
31  
32  
33  
34  
35  
36  
37  
38  
39  
40  
41  
42  
43  
44  
45  
46  
47  
48  
49  
50  
51  
52  
53  
54  
55  
56  
57  
58  
59  
60

170 interviewers<sup>27</sup>. The inter-rater reliability for the MINI will be assessed at each site at the start of study.  
171 Within each study site, at least 10 MINI questionnaires will be completed and compared between two  
172 different researchers blinded from each other. Where needed, further training will be offered to  
173 achieve acceptable inter-rater reliability before researchers are assigned to the study.

#### 174 **Data collection**

175 We will conduct a face-to-face digital survey to collect information about physical health and health-  
176 risk behaviours, severity of common mental disorders and health-related quality of life using validated  
177 instruments as described below. The survey has been translated into the most common languages in  
178 the countries (Urdu in Pakistan, Bangla in Bangladesh and Hindi, Kannada, Tamil and Telugu for India).  
179 The team of interviewers in each county will include males and females and will include researchers  
180 that speak regional dialects, which is consistent with usual clinical practice in these settings<sup>28</sup>.

181 The WHO STEPwise approach to Surveillance (STEPS) instrument Version 3.2 will be used to collect  
182 information about non-communicable diseases and related health-risk behaviours<sup>29</sup>. STEPs is an  
183 international standardized tool that will allow comparisons with the general population within the  
184 country and between countries<sup>30</sup>. The instrument has already been translated, used and validated in  
185 the general population in Bangladesh, India and Pakistan<sup>31-33</sup>.

186 To allow patients to disclose information on sexually transmitted diseases, HIV diagnosis, alcohol and  
187 tobacco consumption, in agreement with patient's wishes, the interviewer will ask the caregivers/  
188 attendants to leave the room for this part of the interview.

#### 189 *Demographic information*

190 The STEPs demographic module will be used to collect information on age, sex, education, marital  
191 status, employment, household assets and income<sup>29</sup>.

#### 192 *Mental health*

193 We will collect information relevant to the SMI diagnosis of each participant, including duration of the  
194 mental illness, any treatment or medication and duration of the treatment and/or medication. The 9-  
195 item depression module (PHQ-9)<sup>34</sup> will be used to measure the severity of depressive symptoms and  
196 the generalized anxiety disorder 7 item scale (GAD-7)<sup>35</sup> for the severity of anxiety symptoms.

#### 197 *Health risk behaviours*

198 The STEPs tobacco modules will be used to assess tobacco-related behaviours<sup>29</sup>.

#### 199 *Alcohol consumption*

200 The STEPs alcohol module will be used to determine lifetime abstainers, past 12 months abstainers and  
201 current users of alcohol using the WHO cut-off scores<sup>29</sup>.

#### 202 *Diet*

203 The STEPs diet module will be used to record the number of days that respondents consumed fruit and  
204 vegetables in a typical week, and the number of servings of fruit and vegetables consumed on average  
205 per day<sup>36</sup>.

#### 206 *Physical activity*

207 The STEPs physical activity module will be used to record activity for transport purposes (e.g. walking,  
208 cycling), vigorous and moderate activity at work, and vigorous, moderate activity in leisure time, and  
209 time spent sitting. Show-cards with culturally relevant examples will be used to aid respondents in  
210 classifying activities. Analysis and categorization will follow the WHO guidelines<sup>37</sup>.

#### 211 *Non-communicable diseases*

212 Any medically-diagnosed history of raised blood pressure, heart disease, hypercholesterolemia, and  
213 high blood glucose, and treatment advised by a health worker for these diseases (such as prescribed  
214 medicines, a special diet, advice to reduce salt intake, lose weight, stop smoking, or do more exercise)  
215 will be collected using the STEPs module for non-communicable diseases. Lung disease is not included

216 in the STEPSs survey. However, it will be recorded asking the same set of questions as the non-  
217 communicable diseases included in the STEPs survey.

#### 218 *Infectious diseases*

219 Self-report of medically diagnosed history of hepatitis B, C, syphilis, tuberculosis, HIV and intestinal  
220 parasites will be recorded.

#### 221 *Risk behaviours related to sexually transmitted diseases*

222 Risk behaviours related to sexually transmitted diseases will be assessed using three questions that  
223 examine the presence of multiple sexual partners, unprotected sexual contact and use of injectable  
224 drugs that have been adapted from the 10 item HIV risk Screening Instrument<sup>38</sup>. This instrument has  
225 been previously used in research involving persons with severe mental illness in India<sup>39</sup>.

#### 226 *Health-Related Quality of life*

227 The EQ-5D-5L will be used to measure health-related quality of life<sup>40,41</sup>. The EQ-5D-5L is a standardised  
228 measure of health status, it provides a simple, generic measure of health for clinical and economic  
229 appraisal. The impact of disease/disorder is characterised on five dimensions (mobility, self-care, ability  
230 to undertake usual activities, pain, anxiety / depression). The EQ-5D-5L further assesses a patient's  
231 subjective evaluation of their health state based on a visual analogue scale (EQ-5d-VAS) between "0 -  
232 worst imaginable health state" and "100 - best imaginable health state". We will use validated  
233 translations provided by EUROQOL.

#### 234 *Blood pressure and heart rate*

235 Blood pressure (BP) and pulse rate will be taken three times using an automated blood pressure  
236 measuring instrument (OMRON®). For BP measurement the participant must be comfortable and  
237 rested. If he/she had been exerting themselves, then there will be a minimum of a 15 minute rest period  
238 before the recording is taken. There should be at least a three minute gap between the BP recordings.  
239 The procedure will follow the step wise instructions in the WHO STEPS surveillance manual<sup>42</sup>.

#### 240 *Height weight and waist circumference*

241 Height will be measured to a precision of 0.1 cm using a portable height measuring board without  
242 footwear and headgear. Weight will be measured in kilograms using a portable weighing scale placed  
243 on a firm flat surface with light clothing and without footwear and socks. Waist circumference will be  
244 measured in to a precision of 0.1 cm, using a flexible fiberglass anthropometric tape at the end of  
245 normal expiration, at the midpoint between the lower margin of the last palpable rib and the top of the  
246 iliac crest (hip bone), with the arms relaxed at the sides. All measurements will be taken in duplicate  
247 and the average of the two values will be recorded and the protocols of the WHO STEPS surveillance  
248 manual will be followed<sup>42</sup>.

#### 249 *Biochemical analysis*

250 A blood sample (8 to 9 ml) will be taken from consenting participants for: glycated haemoglobin  
251 (HbA1c), lipid profile (triglycerides, total cholesterol, HDL cholesterol, LDL cholesterol), thyroid function  
252 tests (includes T3, T4, TSH), liver function tests (total Bilirubin, AST, ALT, ALP, total protein, albumin,  
253 albumin to globulin ratio), creatinine and haemoglobin.

#### 254 *Data management*

255 To ensure quality of collected data, validation, checking, proofing and cleaning procedures will be  
256 carried out according to standard procedures<sup>43</sup>. All consent forms will be stored separately from survey  
257 data in locked cabinets in locked offices at study research offices at each study site. All coded data will  
258 be transferred to, and stored as anonymous data at the University of York which will act as the data  
259 curator. A secure password protected and encrypted electronic database will be set up to store the  
260 data.

### 261 **Statistical analysis**

262 Quantitative data will be summarised using descriptive statistics. First, prevalence rates of infectious  
263 diseases, long-term physical health conditions (e.g. diabetes, heart disease) and health-risk behaviours  
264 for type II diabetes, cardiovascular and respiratory disorders (e.g. tobacco use, obesity, physical activity,  
265 diet) will be estimated in the severe mental illness population. Second, we will examine the associations  
266 between physical health conditions and health-risk behaviours, using regression models with random  
267 intercepts for data collection site with the following potential covariates: demographic variables (i.e.  
268 age, sex, and level of education), history of mental and physical conditions and biomarkers (e.g. BMI,  
269 blood pressure). These regression models will also be used to calculate prevalence rates of physical  
270 health conditions and health-risk behaviours adjusted for these covariates (e.g., for comparison with  
271 external general population data) Further regression analyses will explore the association between  
272 mental and physical health conditions and health-related quality of life measured using EQ-5D-5L.  
273 Regression models will take account of the nature and distribution of data (e.g. count versus continuous  
274 data; skewed versus normally distributed data). To investigate the prevalence of physical health  
275 conditions and health risk behaviours in the general population, we will extract aggregated data on the  
276 prevalence of physical health conditions, health risk behaviours and lifestyle advice from the last  
277 available WHO STEPs survey from Bangladesh<sup>44</sup>, India<sup>45</sup> and Pakistan<sup>46</sup>.

278

### 279 **Ethics and dissemination**

280 The study has been approved by the ethics committees of the Department of Health Sciences University  
281 of York (UK), Centre for Injury Prevention and Research (Bangladesh), Health Ministry Screening  
282 Committee and Indian Council of Medical Research (India) and National Bioethics Committee  
283 (Pakistan).

284 The study will adhere to the fundamental principles of human rights and dignity laid down in the  
285 Declaration of Helsinki<sup>47</sup>. Study procedures will comply with legislation and guidance for good practice  
286 governing the participation in research of people lacking capacity as set out in the Mental Capacity Act  
287 (UK) 2005<sup>48</sup>. Participants will not receive any financial inducement to participate, but the results of the  
288 physical measurements and blood tests will be shared with the participant and the treating clinician.

289 As a non-interventional study, there is minimal risk of adverse events associated with the study. Due to  
290 the vulnerability of the severe mental illness population, however, there is a potential (albeit low) risk  
291 that some questions or the burden of the assessments may cause distress for participants or the family  
292 carers. If there is any indication of this, the survey or assessments will be stopped, the participant  
293 offered reassurance and support, and if needed, referral to the clinical team. If a participant during the  
294 interview reveals any suicidal ideation, the interviewer will refer them to the treating clinician for a  
295 clinical risk assessment and further management. If a physical condition or blood test abnormality  
296 (outside the normal range for age and sex) is detected as a part of the research assessments, the  
297 research team will inform the clinician responsible for the patient, who will evaluate the result and give  
298 the patient the option of referral to a specialist if this is required for their condition.

### 299 **Community, patient and public involvement**

300 A 'Community Panel' comprising stakeholders from these constituencies ensures community, patient  
301 and public involvement. The Panel has reviewed the planned survey and advised on its feasibility. The  
302 panel will continue to provide feedback on the conduct of the study and presentation of findings. To  
303 support dissemination efforts, findings will be presented to the community panel, with advice sought  
304 about the format and content of lay summaries and other outputs aimed at patients and the public.

### 305 **Dissemination**

306 Findings will be disseminated in peer-reviewed articles, in local and international conferences and as  
307 reports for policy makers and stakeholders in the countries involved. An open access repository of all  
308 materials will be built that covers the survey materials as well as statistical syntax used by the team  
309 publications.

### 310 **Discussion**



1  
2  
3 311 People with SMI have a reduced life expectancy. Research in high income countries has shown that a  
4 312 large proportion of this inequality is accounted for by chronic diseases<sup>1,2</sup>. This has been consistently  
5 313 observed in high income countries<sup>3,4</sup>. However information is lacking in minority groups and LMICs,  
6 314 which is surprising considering the increased risk of physical health conditions in these populations due  
7 315 to poverty, education, poor diet, low access to healthcare, exposure to infectious diseases and other  
8 316 environmental factors<sup>49</sup>. The IMPACT SMI survey will address this gap in knowledge, demonstrating  
9 317 the prevalence of different physical health conditions and health-risk behaviours in the SMI population,  
10 318 and the association of each of these conditions in terms of health related quality of life. It will support  
11 319 SMI clinical trial readiness by providing evidence-based findings regarding outcome measures and  
12 320 procedures relevant for clinical trials design.

### 14 321 **Strengths and limitations**

15 322 To the best of the authors' knowledge, this will be the first large scale study to investigate the physical  
16 323 health and health-risk behaviours in the SMI population in LMICs. The main limitation is that the survey  
17 324 is conducted in specialist centres (with patients with capacity) and is therefore a health care utilisation  
18 325 sample drawn largely from tertiary care. The gaps in treatment and care utilisation and systematic  
19 326 factors influencing these have been well documented<sup>50</sup>, therefore, the study population may not be  
20 327 representative of the total severe mental illness population in each country. However, a community  
21 328 survey would not be feasible, and primary and secondary care mental health services are not  
22 329 sufficiently developed to be used to recruit participants for this survey (see for example work by PRIME  
23 330<sup>15</sup> and Emerald<sup>51</sup> programmes on strengthening these services as access points). However, unlike  
24 331 services in high-income countries, tertiary care services in these South Asian countries accept self-  
25 332 referral without the need for primary or secondary care referral and we include outpatient services  
26 333 offered by the collaborating centres which often function as 'the first port of call' for people with mental  
27 334 illness<sup>52-54</sup>. Therefore, the selected centres are likely covering a broad range of the treatment-seeking  
28 335 population. We will not have a control group since the study is only conducted in people with SMI,  
29 336 however we are using the same questions and measurements as the WHO STEPs survey. This will allow  
30 337 us to compare the prevalence of physical health conditions and health risk behaviours with that of a  
31 338 survey representative for the population in each country.

### 33 339 **Conclusion**

34 340 Multimorbidity in people with SMI is not well documented particularly in low- and middle-income  
35 341 countries. The IMPACT survey will be the first to study it using a standardised approach in South Asia  
36 342 that can be compared to the general population.

### 39 343 **Acknowledgements**

40 344 We would like to acknowledge Dr Sue Bellass, Prof. Santosh Kumar Chaturvedi, Dr Arun Kandasamy, Dr  
41 345 Noreen Mdege, Dr Masuma Mishu, Dr Emily Peckham, Prof. Simon Gilbody and the research teams at  
42 346 ARK foundation and The National Institute of Mental Health (NIMH) in Bangladesh, Institute of  
43 347 Psychiatry in Pakistan (IOP) and The National Institute of Mental Health and Neuro-Sciences (NIMHANS)  
44 348 in India for their contribution to the study. We want to thank all the participants and caregivers for  
45 349 taking the time to complete the survey.

### 47 350 **References**

- 48  
49 351 1. Liu NH, Daumit GL, Dua T, et al. Excess mortality in persons with severe mental disorders: a multilevel  
50 352 intervention framework and priorities for clinical practice, policy and research agendas. *World*  
51 353 *psychiatry : official journal of the World Psychiatric Association (WPA)* 2017;16(1):30-40. doi:  
52 354 10.1002/wps.20384 [published Online First: 2017/01/28]  
53 355 2. Walker ER, McGee RE, Druss BG. Mortality in mental disorders and global disease burden  
54 356 implications: a systematic review and meta-analysis. *JAMA psychiatry* 2015;72(4):334-41. doi:  
55 357 10.1001/jamapsychiatry.2014.2502 [published Online First: 2015/02/12]  
56 358 3. Laursen TM. Life expectancy among persons with schizophrenia or bipolar affective disorder.  
57 359 *Schizophrenia research* 2011;131(1-3):101-4. doi: 10.1016/j.schres.2011.06.008 [published  
58 360 Online First: 2011/07/12]  
59 361 4. Fekadu A, Medhin G, Kebede D, et al. Excess mortality in severe mental illness: 10-year population-  
60 362 based cohort study in rural Ethiopia. *The British journal of psychiatry : the journal of mental*

1  
2  
3  
4  
5  
6  
7  
8  
9  
10  
11  
12  
13  
14  
15  
16  
17  
18  
19  
20  
21  
22  
23  
24  
25  
26  
27  
28  
29  
30  
31  
32  
33  
34  
35  
36  
37  
38  
39  
40  
41  
42  
43  
44  
45  
46  
47  
48  
49  
50  
51  
52  
53  
54  
55  
56  
57  
58  
59  
60

- 363 *science* 2015;206(4):289-96. doi: 10.1192/bjp.bp.114.149112 [published Online First:  
364 2015/02/07]
- 365 5. Olfson M, Gerhard T, Huang C, et al. Premature Mortality Among Adults With Schizophrenia in the  
366 United States. *JAMA psychiatry* 2015;72(12):1172-81. doi: 10.1001/jamapsychiatry.2015.1737  
367 [published Online First: 2015/10/29]
- 368 6. Saha S, Chant D, McGrath J. A systematic review of mortality in schizophrenia: is the differential  
369 mortality gap worsening over time? *Archives of general psychiatry* 2007;64(10):1123-31. doi:  
370 10.1001/archpsyc.64.10.1123 [published Online First: 2007/10/03]
- 371 7. Chesney E, Goodwin GM, Fazel S. Risks of all-cause and suicide mortality in mental disorders: a meta-  
372 review. *World psychiatry : official journal of the World Psychiatric Association (WPA)*  
373 2014;13(2):153-60. doi: 10.1002/wps.20128 [published Online First: 2014/06/04]
- 374 8. Mai Q, Holman CD, Sanfilippo FM, et al. The impact of mental illness on potentially preventable  
375 hospitalisations: a population-based cohort study. *BMC psychiatry* 2011;11:163. doi:  
376 10.1186/1471-244X-11-163 [published Online First: 2011/10/12]
- 377 9. Reilly S, Olier I, Planner C, et al. Inequalities in physical comorbidity: a longitudinal comparative  
378 cohort study of people with severe mental illness in the UK. *BMJ open* 2015;5(12):e009010.  
379 doi: 10.1136/bmjopen-2015-009010 [published Online First: 2015/12/17]
- 380 10. Kurihara T, Kato M, Reverger R, et al. Seventeen-year clinical outcome of schizophrenia in Bali.  
381 *European psychiatry : the journal of the Association of European Psychiatrists* 2011;26(5):333-  
382 8. doi: 10.1016/j.eurpsy.2011.04.003 [published Online First: 2011/06/24]
- 383 11. Mogga S, Prince M, Alem A, et al. Outcome of major depression in Ethiopia: population-based study.  
384 *The British journal of psychiatry : the journal of mental science* 2006;189:241-6. doi:  
385 10.1192/bjp.bp.105.013417 [published Online First: 2006/09/02]
- 386 12. Teferra S, Shibre T, Fekadu A, et al. Five-year mortality in a cohort of people with schizophrenia in  
387 Ethiopia. *BMC psychiatry* 2011;11:165. doi: 10.1186/1471-244x-11-165 [published Online  
388 First: 2011/10/12]
- 389 13. Nambiar D, Razzak J, Afsana K, et al. Mental illness and injuries: emerging health challenges of  
390 urbanisation in South Asia. *bmj* 2017;357:j1126.
- 391 14. Misra A, Tandon N, Ebrahim S, et al. Diabetes, cardiovascular disease, and chronic kidney disease in  
392 South Asia: current status and future directions. *bmj* 2017;357:j1420.
- 393 15. Lund C, Tomlinson M, Patel V. Integration of mental health into primary care in low-and middle-  
394 income countries: the PRIME mental healthcare plans. *The British Journal of Psychiatry*  
395 2016;208(s56):s1-s3.
- 396 16. Shavitt S, Cho YI, Johnson TP, et al. Culture moderates the relation between perceived stress, social  
397 support, and mental and physical health. *Journal of Cross-Cultural Psychology* 2016;47(7):956-  
398 80.
- 399 17. The L. Making more of multimorbidity: an emerging priority. *Lancet (London, England)*  
400 2018;391(10131):1637.
- 401 18. Hanlon C. Next steps for meeting the needs of people with severe mental illness in low-and middle-  
402 income countries. *Epidemiology and psychiatric sciences* 2017;26(4):348-54.
- 403 19. Collins PY, Insel TR, Chockalingam A, et al. Grand challenges in global mental health: integration in  
404 research, policy, and practice. *PLoS Med* 2013;10(4):e1001434. doi:  
405 10.1371/journal.pmed.1001434 [published Online First: 2013/05/03]
- 406 20. Baingana F, al'Absi M, Becker AE, et al. Global research challenges and opportunities for mental  
407 health and substance-use disorders. *Nature* 2015;527(7578):S172-7. doi:  
408 10.1038/nature16032 [published Online First: 2015/11/19]
- 409 21. UN. Transforming our world: the 2030 Agenda for Sustainable Development. New York: United  
410 Nations, 2015.
- 411 22. Stubbs B, Koyanagi A, Veronese N, et al. Physical multimorbidity and psychosis: comprehensive  
412 cross sectional analysis including 242,952 people across 48 low-and middle-income countries.  
413 *BMC medicine* 2016;14(1):189.
- 414 23. Organization WH. The ICD-10 classification of mental and behavioural disorders: diagnostic criteria  
415 for research: World Health Organization 1993.
- 416 24. Vancampfort D, Correll CU, Galling B, et al. Diabetes mellitus in people with schizophrenia, bipolar  
417 disorder and major depressive disorder: a systematic review and large scale meta-analysis.  
418 *World psychiatry : official journal of the World Psychiatric Association (WPA)* 2016;15(2):166-  
419 74. doi: 10.1002/wps.20309 [published Online First: 2016/06/07]

- 1  
2  
3 420 25. Buderer NMF. Statistical methodology: I. Incorporating the prevalence of disease into the sample  
4 421 size calculation for sensitivity and specificity. *Academic Emergency Medicine* 1996;3(9):895-  
5 422 900.
- 6 423 26. Lecrubier Y, Sheehan DV, Weiller E, et al. The Mini International Neuropsychiatric Interview (MINI).  
7 424 A short diagnostic structured interview: reliability and validity according to the CIDI. *European*  
8 425 *Psychiatry* 1997;12(5):224-31. doi: [https://doi.org/10.1016/S0924-9338\(97\)83296-8](https://doi.org/10.1016/S0924-9338(97)83296-8)
- 9 426 27. Sheehan DV, Lecrubier Y, Harnett Sheehan K, et al. The validity of the Mini International  
10 427 Neuropsychiatric Interview (MINI) according to the SCID-P and its reliability. *European*  
11 428 *Psychiatry* 1997;12(5):232-41. doi: [https://doi.org/10.1016/S0924-9338\(97\)83297-X](https://doi.org/10.1016/S0924-9338(97)83297-X)
- 12 429 28. Chand P, Murthy P, Arunachalam V, et al. Service utilization in a tertiary psychiatric care setting in  
13 430 South India. *Asian journal of psychiatry* 2010;3(4):222-26.
- 14 431 29. Bonita R, Winkelmann R, Douglas KA, et al. The WHO Stepwise approach to surveillance (STEPS) of  
15 432 non-communicable disease risk factors. *Global behavioral risk factor surveillance*: Springer  
16 433 2003:9-22.
- 17 434 30. Bonita R, De Courten M, Dwyer T, et al. Surveillance of risk factors for noncommunicable diseases:  
18 435 the WHO STEPwise approach: summary: Noncommunicable Diseases and Mental Health,  
19 436 World Health Organization, 2001.
- 20 437 31. Nishtar S, Bile KM, Ahmed A, et al. Integrated population-based surveillance of noncommunicable  
21 438 diseases: the Pakistan model. *American journal of preventive medicine* 2005;29(5):102-06.
- 22 439 32. Mohan V, Mathur P, Deepa R, et al. Urban rural differences in prevalence of self-reported diabetes  
23 440 in India—The WHO–ICMR Indian NCD risk factor surveillance. *Diabetes research and clinical*  
24 441 *practice* 2008;80(1):159-68.
- 25 442 33. Zaman MM, Rahman MM, Rahman MR, et al. Prevalence of risk factors for non-communicable  
26 443 diseases in Bangladesh: results from STEPS survey 2010. *Indian J Public Health* 2016;60(1):17-  
27 444 25.
- 28 445 34. Kroenke K, Spitzer RL. The PHQ-9: a new depression diagnostic and severity measure. *Psychiatric*  
29 446 *annals* 2002;32(9):509-15.
- 30 447 35. Löwe B, Decker O, Müller S, et al. Validation and standardization of the Generalized Anxiety Disorder  
31 448 Screener (GAD-7) in the general population. *Medical care* 2008;46(3):266-74.
- 32 449 36. Fulton SL, McKinley MC, Young IS, et al. The effect of increasing fruit and vegetable consumption  
33 450 on overall diet: a systematic review and meta-analysis. *Critical reviews in food science and*  
34 451 *nutrition* 2016;56(5):802-16.
- 35 452 37. Cleland CL, Hunter RF, Kee F, et al. Validity of the global physical activity questionnaire (GPAQ) in  
36 453 assessing levels and change in moderate-vigorous physical activity and sedentary behaviour.  
37 454 *BMC public health* 2014;14(1):1255.
- 38 455 38. Gerbert B, Bronstone A, McPhee S, et al. Development and testing of an HIV-risk screening  
39 456 instrument for use in health care settings. *American Journal of Preventive Medicine*  
40 457 1998;15(2):103-13.
- 41 458 39. Chandra PS, Carey MP, Carey KB, et al. HIV risk behaviour among psychiatric inpatients: results from  
42 459 a hospital-wide screening study in southern India. *International journal of STD & AIDS*  
43 460 2003;14(8):532-38.
- 44 461 40. Hurst NP, Kind P, Ruta D, et al. Measuring health-related quality of life in rheumatoid arthritis:  
45 462 validity, responsiveness and reliability of EuroQol (EQ-5D). *British journal of rheumatology*  
46 463 1997;36(5):551-9.
- 47 464 41. EuroQol Group. EQ-5D-5L User Guide: Basic information on how to use the EQ-5D-5L instrument  
48 465 (version 2.0) 2013 04/03/2015. 1990.  
49 466 [http://www.euroqol.org/fileadmin/user\\_upload/Documenten/PDF/Folders\\_Flyers/UserGuid](http://www.euroqol.org/fileadmin/user_upload/Documenten/PDF/Folders_Flyers/UserGuide_EQ-5D-5L_v2.0_October_2013.pdf)  
50 467 [e EQ-5D-5L v2.0 October 2013.pdf](http://www.euroqol.org/fileadmin/user_upload/Documenten/PDF/Folders_Flyers/UserGuide_EQ-5D-5L_v2.0_October_2013.pdf). (accessed 09/05/2017).
- 51 468 42. Organization WH. WHO STEPS surveillance manual: the WHO STEPwise approach to chronic disease  
52 469 risk factor surveillance: Geneva: World Health Organization, 2005.
- 53 470 43. Corti L, Van den Eynden V, Bishop L, et al. Managing and sharing research data: a guide to good  
54 471 practice: Sage 2014.
- 55 472 44. Zaman MM, Bhuiyan MR, Karim MN, et al. Clustering of non-communicable diseases risk factors in  
56 473 Bangladeshi adults: an analysis of STEPS survey 2013. *BMC public health* 2015;15(1):659.
- 57 474 45. Bhattacharjee S, Datta S, Roy JK, et al. A cross-sectional assessment of risk factors of non-  
58 475 communicable diseases in a sub-Himalayan region of West Bengal, India using who steps  
59 476 approach. *Journal of The Association of Physicians of India* 2015;63:34.



1  
2  
3  
4  
5  
6  
7  
8  
9  
10  
11  
12  
13  
14  
15  
16  
17  
18  
19  
20  
21  
22  
23  
24  
25  
26  
27  
28  
29  
30  
31  
32  
33  
34  
35  
36  
37  
38  
39  
40  
41  
42  
43  
44  
45  
46  
47  
48  
49  
50  
51  
52  
53  
54  
55  
56  
57  
58  
59  
60

- 477 46. Rafique I, Saqib MA, Munir MA, et al. Prevalence of risk factors for noncommunicable diseases in  
478 adults: key findings from the Pakistan STEPS survey. *East Mediterr Health J* 2018;24(1):33-41.
- 479 47. Williams JR. The Declaration of Helsinki and public health. *Bulletin of the World Health Organization*  
480 2008;86:650-52.
- 481 48. Boyle G. The Mental Capacity Act 2005: promoting the citizenship of people with dementia? *Health*  
482 *& social care in the community* 2008;16(5):529-37.
- 483 49. Allen L, Williams J, Townsend N, et al. Socioeconomic status and non-communicable disease  
484 behavioural risk factors in low-income and lower-middle-income countries: a systematic  
485 review. *The Lancet Global Health* 2017;5(3):e277-e89.
- 486 50. Evans-Lacko S, Aguilar-Gaxiola S, Al-Hamzawi A, et al. Socio-economic variations in the mental  
487 health treatment gap for people with anxiety, mood, and substance use disorders: results from  
488 the WHO World Mental Health (WMH) surveys. *Psychol Med* 2018;48(9):1560-71. doi:  
489 10.1017/s0033291717003336 [published Online First: 2017/11/28]
- 490 51. Semrau M, Evans-Lacko S, Alem A, et al. Strengthening mental health systems in low-and middle-  
491 income countries: the Emerald programme. *BMC medicine* 2015;13(1):79.
- 492 52. Afsar HA, Younus M. Patient referral at the grass-roots level in Pakistan. *Nat Sci(Internet)*  
493 2004;2(4):18-27.
- 494 53. Karim S, Saeed K, Rana MH, et al. Pakistan mental health country profile. *International Review of*  
495 *Psychiatry* 2004;16(1-2):83-92.
- 496 54. Organization WH. Bangladesh health system review: Manila: WHO Regional Office for the Western  
497 Pacific 2015.

498

#### 499 **Authors' contributions**

500 NS conceived the study, KP, FA, DB, RH, SM, PM, AN, SK and KS provided important contextual  
501 information, KP, FP, DB, RH, SM, NS and JB developed the methodology and selected the outcomes,  
502 GZ, AH, KH and JB developed the analysis plan, GZ, NS, KS and JB wrote the manuscript, and all authors  
503 revised and approved the manuscript.

#### 504 **Funding statement**

505 This research was funded by the National Institute for Health Research (NIHR) (17/63/130) using UK aid  
506 from the UK Government to support global health research. The views expressed in this publication are  
507 those of the author(s) and not necessarily those of the NIHR or the UK Department of Health and Social  
508 Care. The funders had no role in study design, data collection and analysis, decision to publish, or  
509 preparation of the manuscript.

#### 510 **Competing interests statement**

511 The authors declare that they have no competing interests

512

#### 513 **Word count**

514 3159 words



Figure 1. Flow diagram of the study

1399x600mm (96 x 96 DPI)

## INVESTIGATING MENTAL AND PHYSICAL COMORBIDITY: Protocol for a survey in people with severe mental illness in South Asia (IMPACT SMI survey)

STROBE Statement—Checklist of items that should be included in reports of *cross-sectional studies*

|                              | Item No | Recommendation                                                                                                                                                                                                                                   |
|------------------------------|---------|--------------------------------------------------------------------------------------------------------------------------------------------------------------------------------------------------------------------------------------------------|
| <b>Title and abstract</b>    | 1       | (a) Indicate the study's design with a commonly used term in the title or the abstract<br><b>Title and abstract lines 1 to 56</b>                                                                                                                |
|                              |         | (b) Provide in the abstract an informative and balanced summary of what was done and what was found<br><b>Abstract lines 32 to 56</b>                                                                                                            |
| <b>Introduction</b>          |         |                                                                                                                                                                                                                                                  |
| Background/rationale         | 2       | Explain the scientific background and rationale for the investigation being reported<br><b>Background paragraphs 1 to 3</b>                                                                                                                      |
| Objectives                   | 3       | State specific objectives, including any prespecified hypotheses<br><b>Background, objectives section lines 93 to 101</b>                                                                                                                        |
| <b>Methods</b>               |         |                                                                                                                                                                                                                                                  |
| Study design                 | 4       | Present key elements of study design early in the paper<br><b>Methods paragraph 1 design setting and population 103 to 115</b>                                                                                                                   |
| Setting                      | 5       | Describe the setting, locations, and relevant dates, including periods of recruitment, exposure, follow-up, and data collection<br><b>Methods paragraph 1 design setting and population lines 103 to 115</b>                                     |
| Participants                 | 6       | (a) Give the eligibility criteria, and the sources and methods of selection of participants<br><b>Methods paragraph 1 design setting and population lines 103 to 115</b>                                                                         |
| Variables                    | 7       | Clearly define all outcomes, exposures, predictors, potential confounders, and effect modifiers. Give diagnostic criteria, if applicable<br><b>Methods, data collection section lines 158 to 231</b>                                             |
| Data sources/<br>measurement | 8*      | For each variable of interest, give sources of data and details of methods of assessment (measurement). Describe comparability of assessment methods if there is more than one group<br><b>Methods, data collection section lines 158 to 231</b> |
| Bias                         | 9       | Describe any efforts to address potential sources of bias<br><b>Discussion, strengths and limitation section lines 297 to 307</b>                                                                                                                |
| Study size                   | 10      | Explain how the study size was arrived at<br><b>Methods section Sample size lines 298 to 311</b>                                                                                                                                                 |
| Quantitative variables       | 11      | Explain how quantitative variables were handled in the analyses. If applicable, describe which groupings were chosen and why<br><b>NA</b>                                                                                                        |
| Statistical methods          | 12      | (a) Describe all statistical methods, including those used to control for confounding<br><b>Methods Statistical analysis section lines 240 to 255</b>                                                                                            |
|                              |         | (b) Describe any methods used to examine subgroups and interactions<br><b>Methods Statistical analysis section lines 240 to 255</b>                                                                                                              |
|                              |         | (c) Explain how missing data were addressed<br><b>NA</b>                                                                                                                                                                                         |
|                              |         | (d) If applicable, describe analytical methods taking account of sampling strategy<br><b>Methods, Recruitment and random selection of the participants lines 123 to 126</b>                                                                      |
|                              |         | (e) Describe any sensitivity analyses                                                                                                                                                                                                            |

---

**Methods Statistical analysis section lines 239 to 255**


---

| <b>Results</b>           |     |                                                                                                                                                                                                                                                                                                                                                                                                                     |
|--------------------------|-----|---------------------------------------------------------------------------------------------------------------------------------------------------------------------------------------------------------------------------------------------------------------------------------------------------------------------------------------------------------------------------------------------------------------------|
| Participants             | 13* | (a) Report numbers of individuals at each stage of study—eg numbers potentially eligible, examined for eligibility, confirmed eligible, included in the study, completing follow-up, and analysed<br>NA<br>(b) Give reasons for non-participation at each stage<br>NA<br>(c) Consider use of a flow diagram<br>NA                                                                                                   |
| Descriptive data         | 14* | (a) Give characteristics of study participants (eg demographic, clinical, social) and information on exposures and potential confounders<br>(b) Indicate number of participants with missing data for each variable of interest<br>NA                                                                                                                                                                               |
| Outcome data             | 15* | Report numbers of outcome events or summary measures<br>NA                                                                                                                                                                                                                                                                                                                                                          |
| Main results             | 16  | (a) Give unadjusted estimates and, if applicable, confounder-adjusted estimates and their precision (eg, 95% confidence interval). Make clear which confounders were adjusted for and why they were included<br>(b) Report category boundaries when continuous variables were categorized<br>(b) If relevant, consider translating estimates of relative risk into absolute risk for a meaningful time period<br>NA |
| Other analyses           | 17  | Report other analyses done—eg analyses of subgroups and interactions, and sensitivity analyses<br>NA                                                                                                                                                                                                                                                                                                                |
| <b>Discussion</b>        |     |                                                                                                                                                                                                                                                                                                                                                                                                                     |
| Key results              | 18  | Summarise key results with reference to study objectives<br>NA                                                                                                                                                                                                                                                                                                                                                      |
| Limitations              | 19  | Discuss limitations of the study, taking into account sources of potential bias or imprecision. Discuss both direction and magnitude of any potential bias<br>NA                                                                                                                                                                                                                                                    |
| Interpretation           | 20  | Give a cautious overall interpretation of results considering objectives, limitations, multiplicity of analyses, results from similar studies, and other relevant evidence<br>NA                                                                                                                                                                                                                                    |
| Generalisability         | 21  | Discuss the generalisability (external validity) of the study results<br>NA                                                                                                                                                                                                                                                                                                                                         |
| <b>Other information</b> |     |                                                                                                                                                                                                                                                                                                                                                                                                                     |
| Funding                  | 22  | Give the source of funding and the role of the funders for the present study and, if applicable, for the original study on which the present article is based<br>NA                                                                                                                                                                                                                                                 |

\*Give information separately for exposed and unexposed groups.

1  
2 **Note:** An Explanation and Elaboration article discusses each checklist item and gives methodological background and  
3 published examples of transparent reporting. The STROBE checklist is best used in conjunction with this article (freely  
4 available on the Web sites of PLoS Medicine at <http://www.plosmedicine.org/>, Annals of Internal Medicine at  
5 <http://www.annals.org/>, and Epidemiology at <http://www.epidem.com/>). Information on the STROBE Initiative is  
6 available at [www.strobe-statement.org](http://www.strobe-statement.org).  
7  
8  
9  
10  
11  
12  
13  
14  
15  
16  
17  
18  
19  
20  
21  
22  
23  
24  
25  
26  
27  
28  
29  
30  
31  
32  
33  
34  
35  
36  
37  
38  
39  
40  
41  
42  
43  
44  
45  
46  
47  
48  
49  
50  
51  
52  
53  
54  
55  
56  
57  
58  
59  
60

For peer review only

# BMJ Open

## Prevalence of physical health conditions and health risk behaviours in people with severe mental illness in South Asia: Protocol for a cross-sectional study (IMPACT SMI survey)

|                                 |                                                                                                                                                                                                                                                                                                                                                                                                                                                                                                                                                                                                                                                                                                                                                                                                                                                                                 |
|---------------------------------|---------------------------------------------------------------------------------------------------------------------------------------------------------------------------------------------------------------------------------------------------------------------------------------------------------------------------------------------------------------------------------------------------------------------------------------------------------------------------------------------------------------------------------------------------------------------------------------------------------------------------------------------------------------------------------------------------------------------------------------------------------------------------------------------------------------------------------------------------------------------------------|
| Journal:                        | <i>BMJ Open</i>                                                                                                                                                                                                                                                                                                                                                                                                                                                                                                                                                                                                                                                                                                                                                                                                                                                                 |
| Manuscript ID                   | bmjopen-2020-037869.R2                                                                                                                                                                                                                                                                                                                                                                                                                                                                                                                                                                                                                                                                                                                                                                                                                                                          |
| Article Type:                   | Protocol                                                                                                                                                                                                                                                                                                                                                                                                                                                                                                                                                                                                                                                                                                                                                                                                                                                                        |
| Date Submitted by the Author:   | 18-Aug-2020                                                                                                                                                                                                                                                                                                                                                                                                                                                                                                                                                                                                                                                                                                                                                                                                                                                                     |
| Complete List of Authors:       | Zavala, Gerardo A.; University of York, Prasad, Krishna; National Institute of Mental Health and Neuro Sciences<br>Aslam, Faiza; Institute of Psychiatry<br>Barua, Deepa; ARK Foundation<br>Haidar, Asiful; ARK Foundation<br>Hewitt, Catherine; The University of York, Health Sciences<br>Huque, Rumana; ARK Foundation<br>Mansoor, Sonia; Institute of Psychiatry<br>Murthy, Pratima; National Institute of Mental Health and NeuroSciences, Centre for Addiction Medicine<br>Nizami, Asad; Institute of Psychiatry<br>Siddiqi, Najma; University of York, Psychiatry, Hull York Medical School, York and Bradford District Care NHS Foundation Trust, Bradford, UK<br>Sikander, Siham; Health Services Academy<br>Siddiqi, Kamran; University of York, UK, Institute of Health Sciences<br>Boehnke, Jan Rasmus; University of Dundee, School of Nursing and Health Sciences |
| <b>Primary Subject Heading</b>: | Global health                                                                                                                                                                                                                                                                                                                                                                                                                                                                                                                                                                                                                                                                                                                                                                                                                                                                   |
| Secondary Subject Heading:      | Global health, Mental health, Epidemiology, Public health                                                                                                                                                                                                                                                                                                                                                                                                                                                                                                                                                                                                                                                                                                                                                                                                                       |
| Keywords:                       | MENTAL HEALTH, Schizophrenia & psychotic disorders < PSYCHIATRY, PSYCHIATRY                                                                                                                                                                                                                                                                                                                                                                                                                                                                                                                                                                                                                                                                                                                                                                                                     |
|                                 |                                                                                                                                                                                                                                                                                                                                                                                                                                                                                                                                                                                                                                                                                                                                                                                                                                                                                 |

SCHOLARONE™  
Manuscripts



I, the Submitting Author has the right to grant and does grant on behalf of all authors of the Work (as defined in the below author licence), an exclusive licence and/or a non-exclusive licence for contributions from authors who are: i) UK Crown employees; ii) where BMJ has agreed a CC-BY licence shall apply, and/or iii) in accordance with the terms applicable for US Federal Government officers or employees acting as part of their official duties; on a worldwide, perpetual, irrevocable, royalty-free basis to BMJ Publishing Group Ltd ("BMJ") its licensees and where the relevant Journal is co-owned by BMJ to the co-owners of the Journal, to publish the Work in this journal and any other BMJ products and to exploit all rights, as set out in our [licence](#).

The Submitting Author accepts and understands that any supply made under these terms is made by BMJ to the Submitting Author unless you are acting as an employee on behalf of your employer or a postgraduate student of an affiliated institution which is paying any applicable article publishing charge ("APC") for Open Access articles. Where the Submitting Author wishes to make the Work available on an Open Access basis (and intends to pay the relevant APC), the terms of reuse of such Open Access shall be governed by a Creative Commons licence – details of these licences and which [Creative Commons](#) licence will apply to this Work are set out in our licence referred to above.

Other than as permitted in any relevant BMJ Author's Self Archiving Policies, I confirm this Work has not been accepted for publication elsewhere, is not being considered for publication elsewhere and does not duplicate material already published. I confirm all authors consent to publication of this Work and authorise the granting of this licence.

1  
2  
3 1 **Prevalence of physical health conditions and health risk behaviours in people with severe mental**  
4 2 **illness in South Asia: Protocol for a cross-sectional study (IMPACT SMI survey)**

5  
6 3 G.A. Zavala<sup>1</sup>, K. Prasad-Muliyala<sup>2</sup>, F. Aslam<sup>3</sup>, D. Barua<sup>4</sup>, A. Haidar<sup>4</sup>, C. Hewitt<sup>1</sup>, R. Huque<sup>4</sup>, S. Mansoor<sup>3</sup>, P.  
7 4 Murthy<sup>2</sup>, A. T. Nizami<sup>3</sup>, N. Siddiqi<sup>1,5,6</sup>, S. Sikander<sup>7,8</sup>, K. Siddiqi<sup>1,5</sup>, J.R. Boehnke<sup>1,9</sup> and on behalf of the  
8 5 IMPACT team.

9 6 **Affiliations**

10 7 <sup>1</sup>Department of Health Sciences, University of York, Heslington, YO10 5DD, York, UK

11 8 <sup>2</sup> National Institute of Mental Health and Neurosciences (NIMHANS), Bangalore, India.

12 9 <sup>3</sup> Institute of Psychiatry (IOP), Rawalpindi Medical University, Rawalpindi, Pakistan

13 10 <sup>4</sup>ARK Foundation, Dhaka, Bangladesh

14 11 <sup>5</sup> Hull York Medical School, University of York Communications Office, Heslington, York, UK

15 12 <sup>6</sup> Bradford District Care NHS Foundation Trust, Bradford, UK

16 13 <sup>7</sup> Human Development Research Foundation, Islamabad, Pakistan

17 14 <sup>8</sup>Public Health, Health Services Academy, Islamabad, Pakistan

18 15 <sup>9</sup>School of Health Sciences, University of Dundee, Dundee, UK

19 16 G.A. Zavala <https://orcid.org/0000-0002-9825-8725> Corresponding author: [gavala@gmail.com](mailto:gavala@gmail.com)

20 17 K. Prasad-Muliyala <https://orcid.org/0000-0002-2580-9581>

21 18 F. Aslam <https://orcid.org/0000-0002-7847-7250>

22 19 D. Barua <https://orcid.org/0000-0002-0122-9048>

23 20 A. Haidar <https://orcid.org/0000-0001-9015-4414>

24 21 C. Hewitt <https://orcid.org/0000-0002-0415-3536>

25 22 R. Huque <http://orcid.org/0000-0003-4724-0581>

26 23 S. Mansoor <http://orcid.org/0000-0002-9837-6852>

27 24 P. Murthy <https://orcid.org/0000-0002-7738-9670>

28 25 A. T. Nizami <https://orcid.org/0000-0002-7853-8519>

29 26 N. Siddiqi <https://orcid.org/0000-0003-1794-2152>

30 27 S. Sikander <https://orcid.org/0000-0002-0223-7234>

31 28 K. Siddiqi <https://orcid.org/0000-0003-1529-7778>

32 29 J.R. Boehnke <https://orcid.org/0000-0003-0249-1870>



1  
2  
3  
4  
5  
6  
7  
8  
9  
10  
11  
12  
13  
14  
15  
16  
17  
18  
19  
20  
21  
22  
23  
24  
25  
26  
27  
28  
29  
30  
31  
32  
33  
34  
35  
36  
37  
38  
39  
40  
41  
42  
43  
44  
45  
46  
47  
48  
49  
50  
51  
52  
53  
54  
55  
56

## 31 Abstract

32 **Introduction:** People with severe mental illness (SMI) die on average 10-20 years earlier than the  
33 general population. Most of these deaths are due to physical health conditions. The aim of this cross-  
34 sectional study is to determine the prevalence of physical health conditions and their associations with  
35 health-risk behaviours, health-related quality of life and various demographic, behavioural, cognitive,  
36 psychological and social variables in people with SMI attending specialist mental health facilities in  
37 South Asia.

38 **Methods and analysis:** We will conduct a survey of patients with SMI attending specialist mental health  
39 facilities in Bangladesh, India and Pakistan (n=4,500). Diagnosis of SMI will be confirmed using the MINI  
40 V-6.0. We will collect information about: physical health and related health-risk behaviours (WHO  
41 STEPs); severity of common mental disorders (PHQ-9 and GAD-7); and health-related quality of life (EQ-  
42 5D-5L). We will measure blood pressure, height, weight and waist-circumference according to WHO  
43 guidelines. We will also measure glycated haemoglobin (HbA1c), lipid profile, thyroid function, liver  
44 function, creatinine and haemoglobin. Prevalence rates of physical health conditions and health-risk  
45 behaviours will be presented and compared with the WHO STEPs survey findings in the general  
46 population. Regression analyses will explore the association between health-risk behaviours, mental  
47 and physical health conditions.

48 **Ethics and dissemination:** The study has been approved by the ethics committees of the Department  
49 of Health Sciences University of York (UK), Centre for Injury Prevention and Rehabilitation (Bangladesh),  
50 Health Ministry Screening Committee and Indian Council of Medical Research (India) and National  
51 Bioethics Committee (Pakistan). Findings will be disseminated in peer reviewed articles, in local and  
52 international conferences and as reports for policy makers and stakeholders in the countries involved.

53 **Trial registration:** ISRCTN88485933; <https://doi.org/10.1186/ISRCTN88485933>, 3rd of June 2019

54 **Key words:** Multimorbidity, Comorbidity, Lifestyle, Severe mental illness, South Asia, health risk  
55 behaviours, schizophrenia, bipolar disorders, psychosis

1  
2  
3  
4  
5  
6  
7  
8  
9  
10  
11  
12  
13  
14  
15  
16  
17  
18  
19  
20  
21  
22  
23  
24  
25  
26  
27  
28  
29  
30  
31  
32  
33  
34  
35  
36  
37  
38  
39  
40  
41  
42  
43  
44  
45  
46  
47  
48  
49  
50  
51  
52  
53  
54  
55  
56  
57  
58  
59  
60  
61  
62  
63  
64  
65  
66  
67

57 **Article summary**

58 ***Strengths and limitations***

- 59 • The study uses standardized tools to measure patient outcomes that will allow us to compare  
60 the findings with those of the general population.
- 61 • The survey will be conducted face to face by trained researchers
- 62 • The questionnaire has been translated into the most common languages used in Bangladesh  
63 India and Pakistan using validated translations of standardized measures where available.
- 64 • The survey is being conducted in specialist centres and is therefore a health care utilisation  
65 sample drawn largely from tertiary care.
- 66 • The study population may not be representative of all the people with severe mental illness in  
67 each country, as those not accessing specialist centres are not included in the survey.

## 69 Background

70 A considerable body of research has shown that people with severe mental illness (SMI; i.e. psychotic  
71 disorders, bipolar affective disorder and severe depression with psychotic symptoms) die on average  
72 10-20 years earlier than the general population<sup>1,2</sup>. Around 80% of deaths in people with SMI are due  
73 to preventable physical illnesses, most commonly cardio-metabolic diseases, respiratory disorders, and  
74 infectious diseases<sup>3,4</sup>. This excess mortality is a major global public health challenge but efforts to  
75 address it have been limited. Recent studies suggest that despite an overall improvement in life  
76 expectancy for both the general population and people with SMI, the absolute mortality gap between  
77 these two groups is actually widening<sup>5-7</sup>.

78 Prevalence of most physical health conditions is higher and outcomes are poorer in this population<sup>8</sup>.  
79 Multimorbidity (the presence of two or more conditions) is also more common<sup>9</sup> in the presence of SMI,  
80 contributing to poorer physical health and quality of life. The majority of evidence for these health  
81 inequalities has been generated in high-income countries (HICs), but a small number of studies from  
82 low- and middle-income countries (LMICs) also show a similar pattern of increased mortality for people  
83 with SMI, with an even shorter life expectancy, and larger mortality gap<sup>4,10-12</sup>. The few studies available  
84 suggest that physical comorbidity in SMI is at least as prevalent as in developed countries<sup>1</sup>.

85 In South Asia, rates of mental illness and physical non-communicable diseases have been increasing  
86 rapidly<sup>13,14</sup>. This increase, coupled with the lack of access to even basic mental healthcare<sup>15</sup>, and  
87 neglect of the physical health needs of people with SMI by policymakers and healthcare services<sup>16</sup>,  
88 means that the burden of disease due to physical disorders in people with mental illness is set to rise  
89 further, with a corresponding increase within country and global health inequalities. This increase is  
90 coupled with a recognized lack of information about the prevalence of physical conditions and health  
91 risk behaviours in the SMI population in South Asia<sup>17</sup>. This gap in knowledge, particularly in relation to  
92 health service planning in LMICs, has been pointed out repeatedly as a priority for research<sup>18</sup>.  
93 Addressing mental and physical health comorbidity in LMICs is also a global priority, recognized in global  
94 policies to help achieve the Sustainable Development Goals, including “ensuring healthy lives and  
95 promoting well-being for all”<sup>19-21</sup>. A detailed understanding of the prevalence of physical health  
96 conditions, health risk behaviours and health service utilization in SMI in LMICs is needed to progress  
97 this agenda<sup>22</sup>.

## 98 Objectives

99 In people with SMI attending specialist mental health facilities:

- 100 1. Determine the prevalence of physical health conditions (i.e. type 2 diabetes, hypertension,  
101 heart disease, obesity and infectious diseases) and health-risk behaviours (i.e. diet, physical  
102 activity, alcohol and tobacco use) and compare these findings with those reported in the  
103 general population.
- 104 2. Determine the association between physical health conditions, health-risk behaviours, health-  
105 related quality of life and various demographic, behavioural, cognitive, psychological and  
106 social variables.
- 107 3. Identify health-service utilization and the type of lifestyle advice that has been offered for this  
108 SMI population.
- 109 4. Support clinical trial readiness by providing evidence-based findings regarding outcome  
110 measures and procedures relevant for clinical trials design.

## 111 Methods and analysis

### 112 Design, settings & population

113 We will conduct a cross-sectional survey among patients with a clinical diagnosis of SMI recruited at  
114 national specialist mental health institutions. In Bangladesh the study will be conducted at the National  
115 Institute of Mental Health and Hospital (NIMH) in Dhaka. NIMH offers 200 beds for in-patient care  
116 and on average 400 out-patients attend every day. In India the study will be conducted at the National  
117 Institute of Mental Health and Neurosciences (NIMHANS) in Bengaluru, with 650 beds for in-patient  
118 care; on average at NIMHANS 400 out-patients attend every day. In Pakistan, the study will be

1  
2  
3 119 conducted at the Institute of Psychiatry (IOP) Rawalpindi Medical University, a WHO collaborating  
4 120 centre for the Eastern Mediterranean (EMRO). IOP offers 60 beds for inpatients and on average 400  
5 121 out-patients attend every day. All three national institutes serve patients from all over the country.  
6 122 Adults (18 years and over) with a clinical diagnosis of SMI (defined by the International Classification of  
7 123 Disease 10<sup>th</sup> revision (ICD-10<sup>23</sup>) as schizophrenia, schizotypal and delusional disorders (F20-F29); bipolar  
8 124 affective disorder (F30, F31); and severe depression with psychotic symptoms (F32.3, F33.3)<sup>23</sup>, who  
9 125 are able to provide informed consent as assessed by the treating clinician will be recruited. Patients  
10 126 who lack capacity to provide consent or are unable to complete study questionnaires will be excluded  
11 127 (figure 1). The data will be collected from June 2019 until September 2020.

### 128 **Sample size**

129 We aim to build as large a sample as possible within the resources available over the study period  
130 (n=1500 per country). As an indicative example of survey precision to address some of the key research  
131 questions, we provide a sample size estimate for investigating the prevalence of diabetes. Assuming a  
132 prevalence estimate of 10% (based on results from previous studies <sup>24</sup>), we will need 857 participants  
133 per country to achieve  $\pm 2\%$  precision assuming a 95% confidence interval<sup>25</sup>.

### 134 **Recruitment and random selection of the participants**

135 Both in- and outpatients attending one of the three specialist mental health institutions collaborating  
136 in this study will be recruited. At NIMHH and NIMHANS patients will be selected randomly using random  
137 number tables generated centrally to determine for outpatients, which patient to approach on a given  
138 day, and for inpatients by randomly selecting beds. Recruitment is separated by in- vs outpatients,  
139 resulting in a proportion of 80% outpatients and 20% inpatients (which has been reported as the  
140 "usual" proportion of in- and outpatients). Due to the lower volume of patients and outpatients  
141 reaching the centre outside working hours at the IOP, all patients attending the IOP during the study  
142 duration will be invited to participate in the survey.

### 143 **Informed consent**

144 In the first instance, the researchers will give an information sheet to the patient, providing written and  
145 verbal information on the potential benefits and risks of taking part in the study and clarifying the  
146 assessments involved in the study. Only people who provided written informed consent will be included  
147 in the study. Where there are problems with literacy, the researchers will provide this information  
148 verbally to both the carer and the patient. Those unable to provide a signature will be requested to  
149 indicate their consent with a thumbprint. The information sheet will meet all the requirements of the  
150 relevant ethics committees. Maintenance of confidentiality and compliance with international, UK and  
151 relevant local Data Protection Acts will be emphasised to all study participants. Moreover, all  
152 participants will be informed that their participation in the study is voluntary, consent can be  
153 withdrawn at any stage and the decision about participation will not affect their care.

154 Mental capacity is time- and decision-specific. For patients who are assessed to lack capacity by their  
155 local physician, seeking informed consent will be delayed until capacity is regained, if feasible. No  
156 assessments will be continued where the patient appears reluctant, even where patient consent has  
157 been obtained.

158 Optional 'consent to contact' about future studies will be sought from survey participants. Permission  
159 will be sought to retain participant details and to contact participants about future studies that may be  
160 relevant for them. Again, it will be emphasised that this is voluntary, they can withdraw permission at  
161 any time, and this will not affect their care in any way. After consenting to participate, the participant  
162 will be given a unique patient identifier (ID) by the researcher. The patient consent and contact  
163 information will be entered into a database (participant log), which will be kept separate from the  
164 survey results database. The survey results database will include only the unique patient ID, and no  
165 patient identifiable data.

### 166 **Confirmation of eligibility**

167 SMI diagnosis will be confirmed by trained researchers using the relevant modules from the Mini-  
168 international neuropsychiatric interview (MINI) version 6.0 <sup>26</sup>. The MINI is a short diagnostic structured  
169 interview to explore mental disorders. It is designed to allow administration by non-specialist

1  
2  
3  
4  
5  
6  
7  
8  
9  
10  
11  
12  
13  
14  
15  
16  
17  
18  
19  
20  
21  
22  
23  
24  
25  
26  
27  
28  
29  
30  
31  
32  
33  
34  
35  
36  
37  
38  
39  
40  
41  
42  
43  
44  
45  
46  
47  
48  
49  
50  
51  
52  
53  
54  
55  
56  
57  
58  
59  
60

170 interviewers<sup>27</sup>. The inter-rater reliability for the MINI will be assessed at each site at the start of study.  
171 Within each study site, at least 10 MINI questionnaires will be completed and compared between two  
172 different researchers blinded from each other. Where needed, further training will be offered to  
173 achieve acceptable inter-rater reliability before researchers are assigned to the study.

#### 174 **Data collection**

175 We will conduct a face-to-face digital survey to collect information about physical health and health-  
176 risk behaviours, severity of common mental disorders and health-related quality of life using validated  
177 instruments as described below. The survey has been translated into the most common languages in  
178 the countries (Urdu in Pakistan, Bangla in Bangladesh and Hindi, Kannada, Tamil and Telugu for India).  
179 The team of interviewers in each county will include males and females and will include researchers  
180 that speak regional dialects, which is consistent with usual clinical practice in these settings <sup>28</sup>.  
181 Participants will be able to express a preference to be interviewed by a researcher of the same gender,  
182 to reduce response bias that might arise due to the gender of the interviewer.

183 The WHO STEPwise approach to Surveillance (STEPS) instrument Version 3.2 will be used to collect  
184 information about non-communicable diseases and related health-risk behaviours<sup>29</sup>. STEPs is an  
185 international standardized tool that will allow comparisons with the general population within the  
186 country and between countries<sup>30</sup>. The instrument has already been translated, used and validated in  
187 the general population in Bangladesh, India and Pakistan <sup>31-33</sup>.

188 To allow patients to disclose information on sexually transmitted diseases, HIV diagnosis, alcohol and  
189 tobacco consumption, in agreement with patient's wishes, the interviewer will ask the caregivers/  
190 attendants to leave the room for this part of the interview.

#### 191 *Demographic information*

192 The STEPs demographic module will be used to collect information on age, sex, education, marital  
193 status, employment, household assets and income <sup>29</sup>.

#### 194 *Mental health*

195 We will collect information relevant to the SMI diagnosis of each participant, including duration of the  
196 mental illness, any treatment or medication and duration of the treatment and/or medication. The 9-  
197 item depression module (PHQ-9)<sup>34</sup> will be used to measure the severity of depressive symptoms and  
198 the generalized anxiety disorder 7 item scale (GAD-7)<sup>35</sup> for the severity of anxiety symptoms.

#### 199 *Health risk behaviours*

200 The STEPs tobacco modules will be used to assess tobacco-related behaviours <sup>29</sup>.

#### 201 *Alcohol consumption*

202 The STEPs alcohol module will be used to determine lifetime abstainers, past 12 months abstainers and  
203 current users of alcohol using the WHO cut-off scores <sup>29</sup>.

#### 204 *Diet*

205 The STEPs diet module will be used to record the number of days that respondents consumed fruit and  
206 vegetables in a typical week, and the number of servings of fruit and vegetables consumed on average  
207 per day <sup>36</sup>.

#### 208 *Physical activity*

209 The STEPs physical activity module will be used to record activity for transport purposes (e.g. walking,  
210 cycling), vigorous and moderate activity at work, and vigorous, moderate activity in leisure time, and  
211 time spent sitting. Show-cards with culturally relevant examples will be used to aid respondents in  
212 classifying activities. Analysis and categorization will follow the WHO guidelines<sup>37</sup>.

#### 213 *Non-communicable diseases*

214 Any medically-diagnosed history of raised blood pressure, heart disease, hypercholesterolemia, and  
215 high blood glucose, and treatment advised by a health worker for these diseases (such as prescribed  
216 medicines, a special diet, advice to reduce salt intake, lose weight, stop smoking, or do more exercise)

217 will be collected using the STEPs module for non-communicable diseases. Lung disease is not included  
218 in the STEPs survey. However, it will be recorded asking the same set of questions as the non-  
219 communicable diseases included in the STEPs survey.

#### 220 *Infectious diseases*

221 Self-report of medically diagnosed history of hepatitis B, C, syphilis, tuberculosis, HIV and intestinal  
222 parasites will be recorded.

#### 223 *Risk behaviours related to sexually transmitted diseases*

224 Risk behaviours related to sexually transmitted diseases will be assessed using three questions that  
225 examine the presence of multiple sexual partners, unprotected sexual contact and use of injectable  
226 drugs that have been adapted from the 10 item HIV risk Screening Instrument<sup>38</sup>. This instrument has  
227 been previously used in research involving persons with severe mental illness in India<sup>39</sup>.

#### 228 *Health-Related Quality of life*

229 The EQ-5D-5L will be used to measure health-related quality of life<sup>40,41</sup>. The EQ-5D-5L is a standardised  
230 measure of health status, it provides a simple, generic measure of health for clinical and economic  
231 appraisal. The impact of disease/disorder is characterised on five dimensions (mobility, self-care, ability  
232 to undertake usual activities, pain, anxiety / depression). The EQ-5D-5L further assesses a patient's  
233 subjective evaluation of their health state based on a visual analogue scale (EQ-5d-VAS) between "0 -  
234 worst imaginable health state" and "100 - best imaginable health state". We will use validated  
235 translations provided by EUROQOL.

#### 236 *Blood pressure and heart rate*

237 Blood pressure (BP) and pulse rate will be taken three times using an automated blood pressure  
238 measuring instrument (OMRON®). For BP measurement the participant must be comfortable and  
239 rested. If he/she had been exerting themselves, then there will be a minimum of a 15 minute rest period  
240 before the recording is taken. There should be at least a three minute gap between the BP recordings.  
241 The procedure will follow the step wise instructions in the WHO STEPS surveillance manual<sup>42</sup>.

#### 242 *Height weight and waist circumference*

243 Height will be measured to a precision of 0.1 cm using a portable height measuring board without  
244 footwear and headgear. Weight will be measured in kilograms using a portable weighing scale placed  
245 on a firm flat surface with light clothing and without footwear and socks. Waist circumference will be  
246 measured in to a precision of 0.1 cm, using a flexible fiberglass anthropometric tape at the end of  
247 normal expiration, at the midpoint between the lower margin of the last palpable rib and the top of the  
248 iliac crest (hip bone), with the arms relaxed at the sides. All measurements will be taken in duplicate  
249 and the average of the two values will be recorded and the protocols of the WHO STEPS surveillance  
250 manual will be followed<sup>42</sup>.

#### 251 *Biochemical analysis*

252 A blood sample (8 to 9 ml) will be taken from consenting participants for: glycated haemoglobin  
253 (HbA1c), lipid profile (triglycerides, total cholesterol, HDL cholesterol, LDL cholesterol), thyroid function  
254 tests (includes T3, T4, TSH), liver function tests (total Bilirubin, AST, ALT, ALP, total protein, albumin,  
255 albumin to globulin ratio), creatinine and haemoglobin.

#### 256 *Data management*

257 To ensure quality of collected data, validation, checking, proofing and cleaning procedures will be  
258 carried out according to standard procedures<sup>43</sup>. All consent forms will be stored separately from survey  
259 data in locked cabinets in locked offices at study research offices at each study site. All coded data will  
260 be transferred to, and stored as anonymous data at the University of York which will act as the data  
261 curator. A secure password protected and encrypted electronic database will be set up to store the  
262 data.



### 263 **Statistical analysis**

264 Quantitative data will be summarised using descriptive statistics. First, prevalence rates of infectious  
265 diseases, long-term physical health conditions (e.g. diabetes, heart disease) and health-risk behaviours  
266 for type II diabetes, cardiovascular and respiratory disorders (e.g. tobacco use, obesity, physical activity,  
267 diet) will be estimated in the severe mental illness population. Second, we will examine the associations  
268 between physical health conditions and health-risk behaviours, using regression models with random  
269 intercepts for data collection site with the following potential covariates: demographic variables (i.e.  
270 age, sex, and level of education), history of mental and physical conditions and biomarkers (e.g. BMI,  
271 blood pressure). These regression models will also be used to calculate prevalence rates of physical  
272 health conditions and health-risk behaviours adjusted for these covariates (e.g., for comparison with  
273 external general population data) Further regression analyses will explore the association between  
274 mental and physical health conditions and health-related quality of life measured using EQ-5D-5L.  
275 Regression models will take account of the nature and distribution of data (e.g. count versus continuous  
276 data; skewed versus normally distributed data). To investigate the prevalence of physical health  
277 conditions and health risk behaviours in the general population, we will extract aggregated data on the  
278 prevalence of physical health conditions, health risk behaviours and lifestyle advice from the last  
279 available WHO STEPs survey from Bangladesh<sup>44</sup>, India<sup>45</sup> and Pakistan<sup>46</sup>.

280

### 281 **Ethics and dissemination**

282 The study has been approved by the ethics committees of the Department of Health Sciences University  
283 of York (UK), Centre for Injury Prevention and Research (Bangladesh), Health Ministry Screening  
284 Committee and Indian Council of Medical Research (India) and National Bioethics Committee  
285 (Pakistan).

286 The study will adhere to the fundamental principles of human rights and dignity laid down in the  
287 Declaration of Helsinki<sup>47</sup>. Study procedures will comply with legislation and guidance for good practice  
288 governing the participation in research of people lacking capacity as set out in the Mental Capacity Act  
289 (UK) 2005<sup>48</sup>. Participants will not receive any financial inducement to participate, but the results of the  
290 physical measurements and blood tests will be shared with the participant and the treating clinician.

291 As a non-interventional study, there is minimal risk of adverse events associated with the study. Due to  
292 the vulnerability of the severe mental illness population, however, there is a potential (albeit low) risk  
293 that some questions or the burden of the assessments may cause distress for participants or the family  
294 carers. If there is any indication of this, the survey or assessments will be stopped, the participant  
295 offered reassurance and support, and if needed, referral to the clinical team. If a participant during the  
296 interview reveals any suicidal ideation, the interviewer will refer them to the treating clinician for a  
297 clinical risk assessment and further management. If a physical condition or blood test abnormality  
298 (outside the normal range for age and sex) is detected as a part of the research assessments, the  
299 research team will inform the clinician responsible for the patient, who will evaluate the result and give  
300 the patient the option of referral to a specialist if this is required for their condition.

### 301 **Community, patient and public involvement**

302 A 'Community Panel' comprising stakeholders from these constituencies ensures community, patient  
303 and public involvement. The Panel has reviewed the planned survey and advised on its feasibility. The  
304 panel will continue to provide feedback on the conduct of the study and presentation of findings. To  
305 support dissemination efforts, findings will be presented to the community panel, with advice sought  
306 about the format and content of lay summaries and other outputs aimed at patients and the public.

### 307 **Dissemination**

308 Findings will be disseminated in peer-reviewed articles, in local and international conferences and as  
309 reports for policy makers and stakeholders in the countries involved. An open access repository of all  
310 materials will be built that covers the survey materials as well as statistical syntax used by the team  
311 publications.

### 312 **Discussion**



1  
2  
3 313 People with SMI have a reduced life expectancy. Research in high income countries has shown that a  
4 314 large proportion of this inequality is accounted for by chronic diseases<sup>1,2</sup>. This has been consistently  
5 315 observed in high income countries<sup>3,4</sup>. However information is lacking in minority groups and LMICs,  
6 316 which is surprising considering the increased risk of physical health conditions in these populations due  
7 317 to poverty, education, poor diet, low access to healthcare, exposure to infectious diseases and other  
8 318 environmental factors<sup>49</sup>. The IMPACT SMI survey will address this gap in knowledge, demonstrating  
9 319 the prevalence of different physical health conditions and health-risk behaviours in the SMI population,  
10 320 and the association of each of these conditions in terms of health related quality of life. It will support  
11 321 SMI clinical trial readiness by providing evidence-based findings regarding outcome measures and  
12 322 procedures relevant for clinical trials design.

### 14 323 **Strengths and limitations**

15 324 To the best of the authors' knowledge, this will be the first large scale study to investigate the physical  
16 325 health and health-risk behaviours in the SMI population in LMICs. The main limitation is that the survey  
17 326 is conducted in specialist centres (with patients with capacity) and is therefore a health care utilisation  
18 327 sample drawn largely from tertiary care. The gaps in treatment and care utilisation and systematic  
19 328 factors influencing these have been well documented<sup>50</sup>, therefore, the study population may not be  
20 329 representative of the total severe mental illness population in each country. However, a community  
21 330 survey would not be feasible, and primary and secondary care mental health services are not  
22 331 sufficiently developed to be used to recruit participants for this survey (see for example work by PRIME  
23 332<sup>15</sup> and Emerald<sup>51</sup> programmes on strengthening these services as access points). However, unlike  
24 333 services in high-income countries, tertiary care services in these South Asian countries accept self-  
25 334 referral without the need for primary or secondary care referral and we include outpatient services  
26 335 offered by the collaborating centres which often function as 'the first port of call' for people with mental  
27 336 illness<sup>52-54</sup>. Therefore, the selected centres are likely covering a broad range of the treatment-seeking  
28 337 population. We will not have a control group since the study is only conducted in people with SMI,  
29 338 however we are using the same questions and measurements as the WHO STEPs survey. This will allow  
30 339 us to compare the prevalence of physical health conditions and health risk behaviours with that of a  
31 340 survey representative for the population in each country.

### 34 341 **Acknowledgements**

35 342 We would like to acknowledge Dr Sue Bellass, Prof. Santosh Kumar Chaturvedi, Dr Arun Kandasamy, Dr  
36 343 Noreen Mdege, Dr Masuma Mishu, Dr Emily Peckham, Prof. Simon Gilbody and the research teams at  
37 344 ARK foundation and The National Institute of Mental Health (NIMH) in Bangladesh, Institute of  
38 345 Psychiatry in Pakistan (IOP) and The National Institute of Mental Health and Neuro-Sciences (NIMHANS)  
39 346 in India for their contribution to the study. We want to thank all the participants and caregivers for  
40 347 taking the time to complete the survey.

### 42 348 **References**

- 43 349 1. Liu NH, Daumit GL, Dua T, et al. Excess mortality in persons with severe mental disorders: a multilevel  
44 350 intervention framework and priorities for clinical practice, policy and research agendas. *World*  
45 351 *psychiatry : official journal of the World Psychiatric Association (WPA)* 2017;16(1):30-40. doi:  
46 352 10.1002/wps.20384 [published Online First: 2017/01/28]
- 47 353 2. Walker ER, McGee RE, Druss BG. Mortality in mental disorders and global disease burden  
48 354 implications: a systematic review and meta-analysis. *JAMA psychiatry* 2015;72(4):334-41. doi:  
49 355 10.1001/jamapsychiatry.2014.2502 [published Online First: 2015/02/12]
- 50 356 3. Laursen TM. Life expectancy among persons with schizophrenia or bipolar affective disorder.  
51 357 *Schizophrenia research* 2011;131(1-3):101-4. doi: 10.1016/j.schres.2011.06.008 [published  
52 358 Online First: 2011/07/12]
- 53 359 4. Fekadu A, Medhin G, Kebede D, et al. Excess mortality in severe mental illness: 10-year population-  
54 360 based cohort study in rural Ethiopia. *The British journal of psychiatry : the journal of mental*  
55 361 *science* 2015;206(4):289-96. doi: 10.1192/bjp.bp.114.149112 [published Online First:  
56 362 2015/02/07]
- 57 363 5. Olfson M, Gerhard T, Huang C, et al. Premature Mortality Among Adults With Schizophrenia in the  
58 364 United States. *JAMA psychiatry* 2015;72(12):1172-81. doi: 10.1001/jamapsychiatry.2015.1737  
59 365 [published Online First: 2015/10/29]

1  
2  
3  
4  
5  
6  
7  
8  
9  
10  
11  
12  
13  
14  
15  
16  
17  
18  
19  
20  
21  
22  
23  
24  
25  
26  
27  
28  
29  
30  
31  
32  
33  
34  
35  
36  
37  
38  
39  
40  
41  
42  
43  
44  
45  
46  
47  
48  
49  
50  
51  
52  
53  
54  
55  
56  
57  
58  
59  
60

- 366 6. Saha S, Chant D, McGrath J. A systematic review of mortality in schizophrenia: is the differential  
367 mortality gap worsening over time? *Archives of general psychiatry* 2007;64(10):1123-31. doi:  
368 10.1001/archpsyc.64.10.1123 [published Online First: 2007/10/03]
- 369 7. Chesney E, Goodwin GM, Fazel S. Risks of all-cause and suicide mortality in mental disorders: a meta-  
370 review. *World psychiatry : official journal of the World Psychiatric Association (WPA)*  
371 2014;13(2):153-60. doi: 10.1002/wps.20128 [published Online First: 2014/06/04]
- 372 8. Mai Q, Holman CD, Sanfilippo FM, et al. The impact of mental illness on potentially preventable  
373 hospitalisations: a population-based cohort study. *BMC psychiatry* 2011;11:163. doi:  
374 10.1186/1471-244X-11-163 [published Online First: 2011/10/12]
- 375 9. Reilly S, Olier I, Planner C, et al. Inequalities in physical comorbidity: a longitudinal comparative  
376 cohort study of people with severe mental illness in the UK. *BMJ open* 2015;5(12):e009010.  
377 doi: 10.1136/bmjopen-2015-009010 [published Online First: 2015/12/17]
- 378 10. Kurihara T, Kato M, Reverger R, et al. Seventeen-year clinical outcome of schizophrenia in Bali.  
379 *European psychiatry : the journal of the Association of European Psychiatrists* 2011;26(5):333-  
380 8. doi: 10.1016/j.eurpsy.2011.04.003 [published Online First: 2011/06/24]
- 381 11. Mogga S, Prince M, Alem A, et al. Outcome of major depression in Ethiopia: population-based study.  
382 *The British journal of psychiatry : the journal of mental science* 2006;189:241-6. doi:  
383 10.1192/bjp.bp.105.013417 [published Online First: 2006/09/02]
- 384 12. Teferra S, Shibre T, Fekadu A, et al. Five-year mortality in a cohort of people with schizophrenia in  
385 Ethiopia. *BMC psychiatry* 2011;11:165. doi: 10.1186/1471-244x-11-165 [published Online  
386 First: 2011/10/12]
- 387 13. Nambiar D, Razzak J, Afsana K, et al. Mental illness and injuries: emerging health challenges of  
388 urbanisation in South Asia. *bmj* 2017;357:j1126.
- 389 14. Misra A, Tandon N, Ebrahim S, et al. Diabetes, cardiovascular disease, and chronic kidney disease in  
390 South Asia: current status and future directions. *bmj* 2017;357:j1420.
- 391 15. Lund C, Tomlinson M, Patel V. Integration of mental health into primary care in low-and middle-  
392 income countries: the PRIME mental healthcare plans. *The British Journal of Psychiatry*  
393 2016;208(s56):s1-s3.
- 394 16. Shavitt S, Cho YI, Johnson TP, et al. Culture moderates the relation between perceived stress, social  
395 support, and mental and physical health. *Journal of Cross-Cultural Psychology* 2016;47(7):956-  
396 80.
- 397 17. The L. Making more of multimorbidity: an emerging priority. *Lancet (London, England)*  
398 2018;391(10131):1637.
- 399 18. Hanlon C. Next steps for meeting the needs of people with severe mental illness in low-and middle-  
400 income countries. *Epidemiology and psychiatric sciences* 2017;26(4):348-54.
- 401 19. Collins PY, Insel TR, Chockalingam A, et al. Grand challenges in global mental health: integration in  
402 research, policy, and practice. *PLoS Med* 2013;10(4):e1001434. doi:  
403 10.1371/journal.pmed.1001434 [published Online First: 2013/05/03]
- 404 20. Baingana F, al'Absi M, Becker AE, et al. Global research challenges and opportunities for mental  
405 health and substance-use disorders. *Nature* 2015;527(7578):S172-7. doi:  
406 10.1038/nature16032 [published Online First: 2015/11/19]
- 407 21. UN. Transforming our world: the 2030 Agenda for Sustainable Development. New York: United  
408 Nations, 2015.
- 409 22. Stubbs B, Koyanagi A, Veronese N, et al. Physical multimorbidity and psychosis: comprehensive  
410 cross sectional analysis including 242,952 people across 48 low-and middle-income countries.  
411 *BMC medicine* 2016;14(1):189.
- 412 23. Organization WH. The ICD-10 classification of mental and behavioural disorders: diagnostic criteria  
413 for research: World Health Organization 1993.
- 414 24. Vancampfort D, Correll CU, Galling B, et al. Diabetes mellitus in people with schizophrenia, bipolar  
415 disorder and major depressive disorder: a systematic review and large scale meta-analysis.  
416 *World psychiatry : official journal of the World Psychiatric Association (WPA)* 2016;15(2):166-  
417 74. doi: 10.1002/wps.20309 [published Online First: 2016/06/07]
- 418 25. Buderer NMF. Statistical methodology: I. Incorporating the prevalence of disease into the sample  
419 size calculation for sensitivity and specificity. *Academic Emergency Medicine* 1996;3(9):895-  
420 900.

- 1  
2  
3 421 26. Lecrubier Y, Sheehan DV, Weiller E, et al. The Mini International Neuropsychiatric Interview (MINI).  
4 422 A short diagnostic structured interview: reliability and validity according to the CIDI. *European*  
5 423 *Psychiatry* 1997;12(5):224-31. doi: [https://doi.org/10.1016/S0924-9338\(97\)83296-8](https://doi.org/10.1016/S0924-9338(97)83296-8)  
6 424 27. Sheehan DV, Lecrubier Y, Harnett Sheehan K, et al. The validity of the Mini International  
7 425 Neuropsychiatric Interview (MINI) according to the SCID-P and its reliability. *European*  
8 426 *Psychiatry* 1997;12(5):232-41. doi: [https://doi.org/10.1016/S0924-9338\(97\)83297-X](https://doi.org/10.1016/S0924-9338(97)83297-X)  
9 427 28. Chand P, Murthy P, Arunachalam V, et al. Service utilization in a tertiary psychiatric care setting in  
10 428 South India. *Asian journal of psychiatry* 2010;3(4):222-26.  
11 429 29. Bonita R, Winkelmann R, Douglas KA, et al. The WHO Stepwise approach to surveillance (STEPS) of  
12 430 non-communicable disease risk factors. *Global behavioral risk factor surveillance*: Springer  
13 431 2003:9-22.  
14 432 30. Bonita R, De Courten M, Dwyer T, et al. Surveillance of risk factors for noncommunicable diseases:  
15 433 the WHO STEPwise approach: summary: Noncommunicable Diseases and Mental Health,  
16 434 World Health Organization, 2001.  
17 435 31. Nishtar S, Bile KM, Ahmed A, et al. Integrated population-based surveillance of noncommunicable  
18 436 diseases: the Pakistan model. *American journal of preventive medicine* 2005;29(5):102-06.  
19 437 32. Mohan V, Mathur P, Deepa R, et al. Urban rural differences in prevalence of self-reported diabetes  
20 438 in India—The WHO–ICMR Indian NCD risk factor surveillance. *Diabetes research and clinical*  
21 439 *practice* 2008;80(1):159-68.  
22 440 33. Zaman MM, Rahman MM, Rahman MR, et al. Prevalence of risk factors for non-communicable  
23 441 diseases in Bangladesh: results from STEPS survey 2010. *Indian J Public Health* 2016;60(1):17-  
24 442 25.  
25 443 34. Kroenke K, Spitzer RL. The PHQ-9: a new depression diagnostic and severity measure. *Psychiatric*  
26 444 *annals* 2002;32(9):509-15.  
27 445 35. Löwe B, Decker O, Müller S, et al. Validation and standardization of the Generalized Anxiety Disorder  
28 446 Screener (GAD-7) in the general population. *Medical care* 2008;46(3):266-74.  
29 447 36. Fulton SL, McKinley MC, Young IS, et al. The effect of increasing fruit and vegetable consumption  
30 448 on overall diet: a systematic review and meta-analysis. *Critical reviews in food science and*  
31 449 *nutrition* 2016;56(5):802-16.  
32 450 37. Cleland CL, Hunter RF, Kee F, et al. Validity of the global physical activity questionnaire (GPAQ) in  
33 451 assessing levels and change in moderate-vigorous physical activity and sedentary behaviour.  
34 452 *BMC public health* 2014;14(1):1255.  
35 453 38. Gerbert B, Bronstone A, McPhee S, et al. Development and testing of an HIV-risk screening  
36 454 instrument for use in health care settings. *American Journal of Preventive Medicine*  
37 455 1998;15(2):103-13.  
38 456 39. Chandra PS, Carey MP, Carey KB, et al. HIV risk behaviour among psychiatric inpatients: results from  
39 457 a hospital-wide screening study in southern India. *International journal of STD & AIDS*  
40 458 2003;14(8):532-38.  
41 459 40. Hurst NP, Kind P, Ruta D, et al. Measuring health-related quality of life in rheumatoid arthritis:  
42 460 validity, responsiveness and reliability of EuroQol (EQ-5D). *British journal of rheumatology*  
43 461 1997;36(5):551-9.  
44 462 41. EuroQol Group. EQ-5D-5L User Guide: Basic information on how to use the EQ-5D-5L instrument  
45 463 (version 2.0) 2013 04/03/2015. 1990.  
46 464 [http://www.euroqol.org/fileadmin/user\\_upload/Documenten/PDF/Folders\\_Flyers/UserGuid](http://www.euroqol.org/fileadmin/user_upload/Documenten/PDF/Folders_Flyers/UserGuide_EQ-5D-5L_v2.0_October_2013.pdf)  
47 465 [e EQ-5D-5L v2.0 October 2013.pdf](http://www.euroqol.org/fileadmin/user_upload/Documenten/PDF/Folders_Flyers/UserGuide_EQ-5D-5L_v2.0_October_2013.pdf). (accessed 09/05/2017).  
48 466 42. Organization WH. WHO STEPS surveillance manual: the WHO STEPwise approach to chronic disease  
49 467 risk factor surveillance: Geneva: World Health Organization, 2005.  
50 468 43. Corti L, Van den Eynden V, Bishop L, et al. Managing and sharing research data: a guide to good  
51 469 practice: Sage 2014.  
52 470 44. Zaman MM, Bhuiyan MR, Karim MN, et al. Clustering of non-communicable diseases risk factors in  
53 471 Bangladeshi adults: an analysis of STEPS survey 2013. *BMC public health* 2015;15(1):659.  
54 472 45. Bhattacharjee S, Datta S, Roy JK, et al. A cross-sectional assessment of risk factors of non-  
55 473 communicable diseases in a sub-Himalayan region of West Bengal, India using who steps  
56 474 approach. *Journal of The Association of Physicians of India* 2015;63:34.  
57 475 46. Rafique I, Saqib MA, Munir MA, et al. Prevalence of risk factors for noncommunicable diseases in  
58 476 adults: key findings from the Pakistan STEPS survey. *East Mediterr Health J* 2018;24(1):33-41.

- 1  
2  
3 477 47. Williams JR. The Declaration of Helsinki and public health. *Bulletin of the World Health Organization*  
4 478 2008;86:650-52.  
5 479 48. Boyle G. The Mental Capacity Act 2005: promoting the citizenship of people with dementia? *Health*  
6 480 *& social care in the community* 2008;16(5):529-37.  
7 481 49. Allen L, Williams J, Townsend N, et al. Socioeconomic status and non-communicable disease  
8 482 behavioural risk factors in low-income and lower-middle-income countries: a systematic  
9 483 review. *The Lancet Global Health* 2017;5(3):e277-e89.  
10 484 50. Evans-Lacko S, Aguilar-Gaxiola S, Al-Hamzawi A, et al. Socio-economic variations in the mental  
11 485 health treatment gap for people with anxiety, mood, and substance use disorders: results from  
12 486 the WHO World Mental Health (WMH) surveys. *Psychol Med* 2018;48(9):1560-71. doi:  
13 487 10.1017/s0033291717003336 [published Online First: 2017/11/28]  
14 488 51. Semrau M, Evans-Lacko S, Alem A, et al. Strengthening mental health systems in low-and middle-  
15 489 income countries: the Emerald programme. *BMC medicine* 2015;13(1):79.  
16 490 52. Afsar HA, Younus M. Patient referral at the grass-roots level in Pakistan. *Nat Sci(Internet)*  
17 491 2004;2(4):18-27.  
18 492 53. Karim S, Saeed K, Rana MH, et al. Pakistan mental health country profile. *International Review of*  
19 493 *Psychiatry* 2004;16(1-2):83-92.  
20 494 54. Organization WH. Bangladesh health system review: Manila: WHO Regional Office for the Western  
21 495 Pacific 2015.

22 496

23 497 **Authors' contributions**

24  
25  
26 498 NS conceived the study, KP, FA, DB, RH, SM, PM, AN, SS and KS provided important contextual  
27 499 information, KP, FA, DB, AH, SM, NS, KS and JB developed the methodology and selected the outcomes,  
28 500 GZ, AH, CH and JB developed the analysis plan, GZ, NS, KS and JB wrote the manuscript, and all authors  
29 501 revised and approved the manuscript.

30 502 **Funding statement**

31  
32 503 This research was funded by the National Institute for Health Research (NIHR) (17/63/130) using UK aid  
33 504 from the UK Government to support global health research. The views expressed in this publication are  
34 505 those of the author(s) and not necessarily those of the NIHR or the UK Department of Health and Social  
35 506 Care. The funders had no role in study design, data collection and analysis, decision to publish, or  
36 507 preparation of the manuscript.

37 508 **Competing interests statement**

38  
39 509 The authors declare that they have no competing interests

40 510

41 511 **Word count**

42 512 3159 words

43 513 **Figure legend**

44 514 Figure 1. Study flow chart

45 515

1  
2  
3  
4  
5  
6  
7  
8  
9  
10  
11  
12  
13  
14  
15  
16  
17  
18  
19  
20  
21  
22  
23  
24  
25  
26  
27  
28  
29  
30  
31  
32  
33  
34  
35  
36  
37  
38  
39  
40  
41  
42  
43  
44  
45  
46  
47  
48  
49  
50  
51  
52  
53  
54  
55  
56  
57  
58  
59  
60

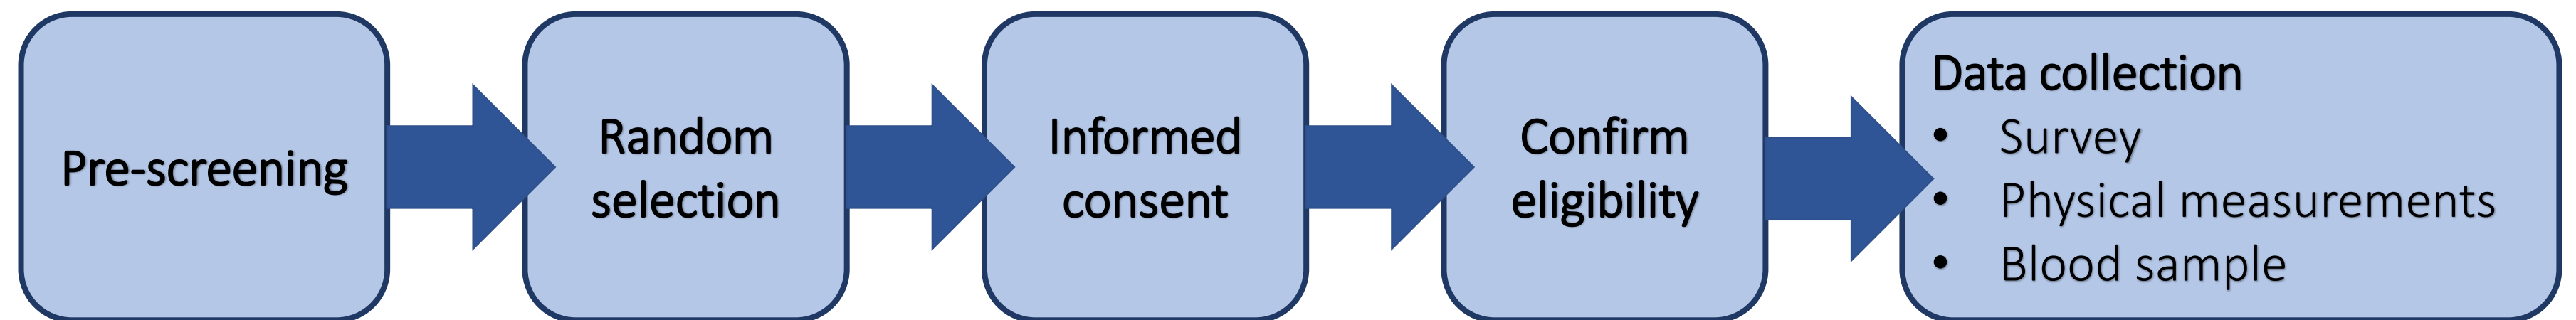



## INVESTIGATING MENTAL AND PHYSICAL COMORBIDITY: Protocol for a survey in people with severe mental illness in South Asia (IMPACT SMI survey)

STROBE Statement—Checklist of items that should be included in reports of *cross-sectional studies*

|                              | Item No | Recommendation                                                                                                                                                                                                                                   |
|------------------------------|---------|--------------------------------------------------------------------------------------------------------------------------------------------------------------------------------------------------------------------------------------------------|
| <b>Title and abstract</b>    | 1       | (a) Indicate the study's design with a commonly used term in the title or the abstract<br><b>Title and abstract lines 1 to 56</b>                                                                                                                |
|                              |         | (b) Provide in the abstract an informative and balanced summary of what was done and what was found<br><b>Abstract lines 32 to 56</b>                                                                                                            |
| <b>Introduction</b>          |         |                                                                                                                                                                                                                                                  |
| Background/rationale         | 2       | Explain the scientific background and rationale for the investigation being reported<br><b>Background paragraphs 1 to 3</b>                                                                                                                      |
| Objectives                   | 3       | State specific objectives, including any prespecified hypotheses<br><b>Background, objectives section lines 93 to 101</b>                                                                                                                        |
| <b>Methods</b>               |         |                                                                                                                                                                                                                                                  |
| Study design                 | 4       | Present key elements of study design early in the paper<br><b>Methods paragraph 1 design setting and population 103 to 115</b>                                                                                                                   |
| Setting                      | 5       | Describe the setting, locations, and relevant dates, including periods of recruitment, exposure, follow-up, and data collection<br><b>Methods paragraph 1 design setting and population lines 103 to 115</b>                                     |
| Participants                 | 6       | (a) Give the eligibility criteria, and the sources and methods of selection of participants<br><b>Methods paragraph 1 design setting and population lines 103 to 115</b>                                                                         |
| Variables                    | 7       | Clearly define all outcomes, exposures, predictors, potential confounders, and effect modifiers. Give diagnostic criteria, if applicable<br><b>Methods, data collection section lines 158 to 231</b>                                             |
| Data sources/<br>measurement | 8*      | For each variable of interest, give sources of data and details of methods of assessment (measurement). Describe comparability of assessment methods if there is more than one group<br><b>Methods, data collection section lines 158 to 231</b> |
| Bias                         | 9       | Describe any efforts to address potential sources of bias<br><b>Discussion, strengths and limitation section lines 297 to 307</b>                                                                                                                |
| Study size                   | 10      | Explain how the study size was arrived at<br><b>Methods section Sample size lines 298 to 311</b>                                                                                                                                                 |
| Quantitative variables       | 11      | Explain how quantitative variables were handled in the analyses. If applicable, describe which groupings were chosen and why<br><b>NA</b>                                                                                                        |
| Statistical methods          | 12      | (a) Describe all statistical methods, including those used to control for confounding<br><b>Methods Statistical analysis section lines 240 to 255</b>                                                                                            |
|                              |         | (b) Describe any methods used to examine subgroups and interactions<br><b>Methods Statistical analysis section lines 240 to 255</b>                                                                                                              |
|                              |         | (c) Explain how missing data were addressed<br><b>NA</b>                                                                                                                                                                                         |
|                              |         | (d) If applicable, describe analytical methods taking account of sampling strategy<br><b>Methods, Recruitment and random selection of the participants lines 123 to 126</b>                                                                      |
|                              |         | (e) Describe any sensitivity analyses                                                                                                                                                                                                            |

---

**Methods Statistical analysis section lines 239 to 255**


---

| <b>Results</b>           |     |                                                                                                                                                                                                                                                                                                                                                                                                                     |
|--------------------------|-----|---------------------------------------------------------------------------------------------------------------------------------------------------------------------------------------------------------------------------------------------------------------------------------------------------------------------------------------------------------------------------------------------------------------------|
| Participants             | 13* | (a) Report numbers of individuals at each stage of study—eg numbers potentially eligible, examined for eligibility, confirmed eligible, included in the study, completing follow-up, and analysed<br>NA<br>(b) Give reasons for non-participation at each stage<br>NA<br>(c) Consider use of a flow diagram<br>NA                                                                                                   |
| Descriptive data         | 14* | (a) Give characteristics of study participants (eg demographic, clinical, social) and information on exposures and potential confounders<br>(b) Indicate number of participants with missing data for each variable of interest<br>NA                                                                                                                                                                               |
| Outcome data             | 15* | Report numbers of outcome events or summary measures<br>NA                                                                                                                                                                                                                                                                                                                                                          |
| Main results             | 16  | (a) Give unadjusted estimates and, if applicable, confounder-adjusted estimates and their precision (eg, 95% confidence interval). Make clear which confounders were adjusted for and why they were included<br>(b) Report category boundaries when continuous variables were categorized<br>(b) If relevant, consider translating estimates of relative risk into absolute risk for a meaningful time period<br>NA |
| Other analyses           | 17  | Report other analyses done—eg analyses of subgroups and interactions, and sensitivity analyses<br>NA                                                                                                                                                                                                                                                                                                                |
| <b>Discussion</b>        |     |                                                                                                                                                                                                                                                                                                                                                                                                                     |
| Key results              | 18  | Summarise key results with reference to study objectives<br>NA                                                                                                                                                                                                                                                                                                                                                      |
| Limitations              | 19  | Discuss limitations of the study, taking into account sources of potential bias or imprecision. Discuss both direction and magnitude of any potential bias<br>NA                                                                                                                                                                                                                                                    |
| Interpretation           | 20  | Give a cautious overall interpretation of results considering objectives, limitations, multiplicity of analyses, results from similar studies, and other relevant evidence<br>NA                                                                                                                                                                                                                                    |
| Generalisability         | 21  | Discuss the generalisability (external validity) of the study results<br>NA                                                                                                                                                                                                                                                                                                                                         |
| <b>Other information</b> |     |                                                                                                                                                                                                                                                                                                                                                                                                                     |
| Funding                  | 22  | Give the source of funding and the role of the funders for the present study and, if applicable, for the original study on which the present article is based<br>NA                                                                                                                                                                                                                                                 |

\*Give information separately for exposed and unexposed groups.



1  
2 **Note:** An Explanation and Elaboration article discusses each checklist item and gives methodological background and  
3 published examples of transparent reporting. The STROBE checklist is best used in conjunction with this article (freely  
4 available on the Web sites of PLoS Medicine at <http://www.plosmedicine.org/>, Annals of Internal Medicine at  
5 <http://www.annals.org/>, and Epidemiology at <http://www.epidem.com/>). Information on the STROBE Initiative is  
6 available at [www.strobe-statement.org](http://www.strobe-statement.org).  
7  
8  
9  
10  
11  
12  
13  
14  
15  
16  
17  
18  
19  
20  
21  
22  
23  
24  
25  
26  
27  
28  
29  
30  
31  
32  
33  
34  
35  
36  
37  
38  
39  
40  
41  
42  
43  
44  
45  
46  
47  
48  
49  
50  
51  
52  
53  
54  
55  
56  
57  
58  
59  
60

For peer review only
